# Supplementary material for: The cyclic peptide G4CP2 enables the modulation of galactose metabolism in yeast by interfering with GAL4 transcriptional activity
Source: Front Mol Biosci. 2023 Mar 1;10:1017757. doi: 10.3389/fmolb.2023.1017757 (PMC10014601; doi:10.3389/fmolb.2023.1017757)
Supplement: Supplementary file 15 [file Table5.XLSX]

## Sheet: SICLOPPS Gal 0.1 Glu 0.1
Supplementary Dataset 5
Raw data for the fluorescence measurment over time of BY4741 pGAL1::YFP expressing or not SICLOPPS-based G4CP2
Gal/Glu=1:1		Gal 0.1%+Glu 0.1%
n=16
YFP/OD
Time (min)	BY4741 pGAL1::YFP																BY4741 pGAL1::YFP +SICLOPPS:G4CP2
0	3.97632	2.35117	2.79879	3.76265	2.74957	3.2798	3.39233	2.89347	3.04842	2.15406	3.08529	2.09094	2.14855	3.10831	3.39742	2.91685	1.84662	3.07326	3.60505	3.24782	3.19883	3.72683	2.42124	3.34626	2.86517	3.08064	2.35978	2.35966	3.54863	2.60767	2.63428	3.70859
30	3.45978	2.12805	2.58767	3.37261	2.36153	2.72841	2.91525	2.53873	2.60878	1.83176	2.79213	1.54941	1.95162	2.68697	2.82807	2.61629	1.90823	2.69043	3.16469	2.93264	2.84023	3.34216	1.96006	3.03236	2.79758	2.94684	2.33146	2.14632	3.13225	2.21753	2.36767	3.32722
60	2.9164	1.99857	2.40761	2.92835	2.25094	2.48329	2.52188	2.41867	2.38383	1.75764	2.4608	1.54024	1.82027	2.51969	2.62315	2.35489	1.87409	2.68105	2.98669	2.8273	2.82893	2.91155	1.79589	2.75041	2.7909	2.81859	2.28425	2.10388	2.96796	1.98129	2.1979	3.15695
90	2.72444	1.84081	2.26984	2.72245	2.20408	2.38319	2.45573	2.27787	2.08183	1.76886	2.3134	1.48022	1.72209	2.32246	2.52315	2.37219	1.87351	2.44947	2.78443	2.70489	2.54947	2.74941	1.73438	2.72702	2.53619	2.615	2.13289	2.09913	2.64024	1.91691	2.10183	3.08142
120	2.52486	1.7998	2.1008	2.45174	1.90898	2.17185	2.18176	2.1139	2.05112	1.71356	2.20173	1.27626	1.62321	2.09713	2.35173	2.25235	1.84845	2.37046	2.80921	2.57078	2.43463	2.46179	1.65502	2.56641	2.58536	2.53654	1.94191	1.90598	2.48221	1.76773	1.99791	2.76143
150	2.39052	1.64132	2.02163	2.24526	1.91473	1.94926	2.04778	1.99031	1.91187	1.65465	2.06192	1.13951	1.54641	2.06887	2.176	2.19277	1.75718	2.19423	2.72457	2.48176	2.3183	2.36666	1.62738	2.42394	2.33094	2.28779	1.928	1.91361	2.31555	1.71546	1.89857	2.52487
180	2.18432	1.61178	2.02996	2.13627	1.778	1.91071	1.91356	1.98189	1.81954	1.56562	2.03025	1.03902	1.51718	1.89603	2.03813	2.0827	1.70691	2.10419	2.59171	2.30016	2.18841	2.31484	1.47008	2.25782	2.1732	2.11337	1.78769	1.71147	2.13691	1.65093	1.78654	2.28996
210	2.13877	1.7009	1.99709	1.96565	1.74983	1.80853	1.92178	1.94976	1.86683	1.63435	1.89734	1.12577	1.58333	1.91712	1.99809	2.04211	1.69368	1.97288	2.50207	2.11916	2.15887	2.08391	1.32337	2.28883	2.07451	2.16344	1.71253	1.69574	1.9519	1.53426	1.70273	2.17594
240	2.18216	2.00113	2.23459	2.11934	1.93109	1.81328	2.01196	2.07805	1.97562	2.07951	2.06937	1.27633	1.89057	2.1066	2.18824	2.09561	1.64563	1.90562	2.24842	2.08545	1.98224	1.98016	1.29948	2.05334	2.05796	1.90748	1.68472	1.6365	1.84421	1.54989	1.63788	2.08316
270	2.44414	2.73624	2.71943	2.3782	2.38499	2.23801	2.36883	2.42781	2.60199	2.68271	2.46765	1.63304	2.5402	2.56871	2.49113	2.60522	1.66009	1.77506	2.12622	1.9558	1.88529	1.86965	1.4238	1.97336	1.97247	1.89873	1.63803	1.60579	1.79749	1.45323	1.5093	1.96977
300	3.04185	3.92727	3.79944	3.09222	3.39113	2.92164	2.98205	3.23087	3.46365	4.05316	3.25425	2.20579	3.61372	3.51923	3.32731	3.50392	1.71892	1.74892	2.02113	1.87037	1.86796	1.87992	1.4609	1.96514	1.9399	1.91031	1.57655	1.67588	1.73464	1.45164	1.57396	1.86915
330	4.11594	5.27319	4.92804	4.322	4.87454	4.07602	4.06863	3.99632	4.95835	5.83934	4.6067	3.09163	4.7456	4.78396	4.46374	4.4607	1.92915	1.79506	2.06426	1.88577	1.94177	1.84119	1.54015	1.99484	2.01697	1.94215	1.70642	1.85739	1.79497	1.58361	1.60504	1.85794
360	5.38062	6.56964	6.22436	5.62983	6.43244	5.28483	5.2101	4.93606	6.36083	7.90521	6.06465	4.07102	5.92177	6.14154	5.82741	5.3241	2.24343	2.03936	2.09712	2.10679	2.162	1.98295	1.71929	2.1367	2.28282	2.12224	1.89212	2.06028	2.05845	1.8838	1.85011	1.99375
390	6.36364	7.60838	7.36673	6.91242	7.86417	6.46252	6.37163	5.69521	7.47388	10.4936	7.46461	5.01745	6.69743	7.39488	6.8401	6.2558	2.81361	2.42737	2.49844	2.40957	2.55717	2.32602	2.07441	2.55336	2.77577	2.55968	2.39751	2.67597	2.62736	2.42846	2.36633	2.24617
420	7.251	8.65253	8.33675	7.84505	9.34707	7.37462	7.51714	6.53196	8.5639	12.6738	8.89009	6.92337	7.5955	8.37733	8.21229	7.0729	3.56104	3.19284	3.14793	3.03369	3.28383	2.96396	2.58464	3.08122	3.48523	3.19796	3.08636	3.59177	3.55494	3.08338	3.23647	2.79595
450	8.01961	9.5777	9.3016	9.27447	10.7983	8.47237	8.63906	7.57839	9.35507	14.4646	10.0174	8.94343	8.39526	9.43764	9.19099	8.01993	4.45721	4.06119	3.87228	3.86508	3.98785	3.81161	3.15262	3.99925	4.55055	4.16504	3.96041	4.7641	4.75326	3.81371	4.39068	3.71629
480	8.8537	10.5339	10.0736	10.1773	11.7739	9.5205	9.74909	8.32702	10.0701	16.5779	11.0179	11.6618	9.10307	10.2665	10.229	8.92152	5.09927	4.90547	4.80121	4.84052	4.8757	4.64482	3.65315	4.81196	5.39275	4.94142	4.61762	5.71429	6.19247	4.42714	5.72245	4.79575
510	9.90476	11.2446	10.8291	11.1537	12.9703	10.6759	10.6738	9.49505	10.4886	18.5075	12.0309	15.0811	10.0069	11.0257	11.1853	9.69728	5.74763	5.66436	5.1955	5.39098	5.52798	5.13668	4.19313	5.3708	6.15999	5.62563	5.15637	6.50405	7.44242	5.1186	6.78935	5.56022
540	10.6943	11.9891	11.5262	12.2648	14.0464	11.5403	11.6852	10.2219	11.3129	20.1447	12.8922	18.4635	10.6164	11.8244	11.9974	10.6962	6.2463	6.20673	5.7838	5.97385	6.03546	5.54717	4.66345	5.88173	6.84769	5.97867	5.57865	7.03709	8.56237	5.71291	7.86805	6.40219
570	11.749	12.47	12.1449	13.3125	15.2215	12.4732	12.4336	11.115	11.8101	21.9554	13.707	22.7698	11.298	12.4402	12.9232	11.5302	6.89968	6.61146	6.25399	6.36318	6.43441	5.89933	5.31548	6.18072	7.36663	6.44423	5.90982	7.53574	9.32181	6.22787	8.82039	7.34354
600	12.7366	13.0272	12.5736	13.9525	16.0482	13.4656	13.342	11.7425	12.3637	23.2427	14.1631	25.774	12.0867	12.9184	13.4432	11.9747	7.1654	7.2354	6.59071	6.94087	7.03365	6.16158	6.13049	6.60425	8.0686	7.01049	6.25872	7.98446	10.153	6.94121	9.85402	7.97378
630	13.2532	13.2455	12.7859	14.5065	16.8118	14.043	13.8342	12.3622	12.3817	24.2775	14.6064	29.2306	12.3644	13.4104	13.9369	12.5237	7.56608	7.58713	6.95775	7.17173	7.39547	6.46192	7.22538	7.03306	8.70241	7.42246	6.74584	8.3032	10.8103	7.54281	10.7385	8.78491
660	13.8451	13.4834	13.0178	15.092	17.2843	14.5859	14.2782	12.5747	12.6728	24.7694	14.8362	32.3585	12.5559	13.6594	14.2797	12.7554	7.85665	7.99272	7.38145	7.8436	7.95455	6.70478	8.16362	7.58242	9.53341	7.74218	7.08631	8.92403	11.6037	8.24149	11.5875	9.29962
690	14.0787	13.4938	12.9643	15.4127	17.7351	15.2352	14.8546	13.0616	12.9588	24.7155	15.1448	35.1593	12.7331	13.8742	14.439	13.2986	7.98244	8.31882	7.60521	8.1898	8.42129	7.10619	8.90554	7.91601	10.1288	8.10357	7.25776	9.08437	12.3983	8.9052	12.4761	10.0866
720	14.8522	13.6482	13.0957	15.8217	18.0815	15.5514	15.2288	13.4566	13.0908	24.6103	15.3136	37.6983	13.2011	14.0327	14.6304	13.5246	8.31121	8.53492	7.89814	8.36929	8.6936	7.27142	9.56823	8.12684	10.5823	8.34999	7.54085	9.4776	12.8755	9.36794	13.3152	10.9137
750	15.2931	14.1279	13.2972	16.2005	18.599	15.7955	15.5556	14.2527	13.2361	24.9019	15.5117	41.2873	13.3036	14.2053	14.8274	13.7611	8.40827	8.69911	7.99576	8.60771	8.86697	7.33653	10.4241	8.22131	10.9944	8.50966	7.7284	9.45642	13.3183	9.94683	13.7893	11.3592
780	15.8686	14.727	13.5202	16.5991	19.084	16.1918	15.9053	14.9305	13.6328	25.1354	15.8412	44.8651	13.6227	14.64	15.2156	14.2597	8.25598	8.80221	8.06028	8.72464	9.15652	7.32769	11.3078	8.2086	11.2336	8.54293	7.70066	9.66445	13.4175	10.3274	14.3797	12.015
810	16.6812	14.8515	13.7412	17.3411	19.534	16.5525	16.3971	15.3282	14.1326	25.4735	16.3335	46.9749	14.1059	14.991	15.7417	14.8726	8.26235	8.71962	8.2104	8.90774	9.2336	7.43351	11.5906	8.29967	11.3984	8.56929	7.74702	9.60803	13.743	10.8836	14.7539	12.3143
840	17.539	15.4603	14.2197	17.8484	20.406	17.1973	16.9882	15.8249	14.6156	25.9818	16.658	49.5515	14.6679	15.6898	16.3028	15.3804	8.26535	8.97769	8.30202	8.94974	9.34017	7.47623	12.8861	8.3657	11.8381	8.81148	8.0262	9.84204	13.938	11.1788	15.2875	12.7364
870	18.0052	15.8253	14.4789	18.3196	20.8293	17.6713	17.625	16.4139	15.1557	26.2352	17.0612	53.7942	14.7303	16.0672	16.6054	15.5644	8.30581	8.97279	8.39494	9.19905	9.4189	7.54689	13.2225	8.66375	12.215	8.9487	8.07814	9.8103	14.1896	11.5877	15.8585	13.2349
900	18.6197	16.2515	14.788	18.7412	21.6223	18.2437	18.2297	17.0568	15.5894	26.8114	17.4971	55.9809	15.2692	16.8226	16.9279	16.0863	8.24267	9.10772	8.32169	9.46626	9.77352	7.53255	14.0601	8.73476	12.5334	9.0101	8.10225	10.0094	14.3351	11.791	16.0498	13.7699
930	19.1871	16.5997	14.9261	18.8744	21.7319	18.632	18.6406	17.5181	16.0726	27.0354	17.5286	57.9469	15.5965	17.0645	17.313	16.4389	8.40659	9.35006	8.61194	9.88749	10.0208	7.63989	14.5959	9.01563	12.9747	9.15118	8.16498	10.3501	14.8584	12.2873	16.6265	14.2333
n=16
YFP
Time (min)	BY4741 pGAL1::YFP																BY4741 pGAL1::YFP +SICLOPPS:G4CP2
0	0.6716	0.6943	0.6927	0.6769	0.6368	0.6576	0.6632	0.66	0.6673	0.6096	0.6692	0.5403	0.6306	0.6773	0.6856	0.67	0.6694	0.6838	0.7001	0.6697	0.7079	0.6917	0.5995	0.7074	0.6269	0.6762	0.6395	0.6692	0.6714	0.6321	0.6317	0.6694
30	0.6667	0.6897	0.701	0.687	0.631	0.6319	0.6708	0.6489	0.6775	0.6402	0.681	0.5268	0.6495	0.6704	0.6629	0.6648	0.7028	0.6605	0.6687	0.6531	0.6791	0.6945	0.6233	0.6841	0.6468	0.6763	0.664	0.6381	0.6584	0.6351	0.6459	0.6345
60	0.6314	0.6971	0.6893	0.6662	0.6557	0.6315	0.6398	0.6632	0.6987	0.644	0.6686	0.5206	0.6502	0.6909	0.6752	0.6337	0.6966	0.7019	0.6732	0.6712	0.7276	0.6781	0.6036	0.6634	0.6807	0.6914	0.6903	0.6663	0.6948	0.6354	0.6497	0.6497
90	0.6476	0.6857	0.6864	0.6768	0.6804	0.6549	0.6795	0.6599	0.6564	0.6681	0.6732	0.5425	0.6525	0.6835	0.6921	0.6654	0.708	0.6763	0.6652	0.6746	0.6983	0.6989	0.6216	0.6973	0.6518	0.6799	0.6789	0.7009	0.6693	0.6621	0.6646	0.685
120	0.6552	0.7165	0.6836	0.6681	0.6334	0.642	0.6626	0.6477	0.6982	0.6748	0.6865	0.5576	0.6587	0.6585	0.686	0.6721	0.7196	0.6981	0.6773	0.6828	0.7058	0.6797	0.6299	0.6937	0.7027	0.7011	0.6552	0.673	0.6836	0.653	0.6691	0.6644
150	0.6758	0.7015	0.7011	0.6637	0.6916	0.6339	0.6729	0.6572	0.6942	0.6933	0.686	0.5693	0.6747	0.6999	0.6837	0.6973	0.7157	0.6846	0.6776	0.7006	0.7145	0.6984	0.6586	0.6947	0.6804	0.6781	0.6962	0.7155	0.6986	0.6668	0.6757	0.66
180	0.6743	0.7498	0.7657	0.6992	0.7112	0.6869	0.6818	0.7115	0.7078	0.7086	0.7248	0.5965	0.7243	0.7021	0.6895	0.7177	0.7309	0.7089	0.6938	0.6981	0.7248	0.7345	0.6608	0.6927	0.6763	0.6748	0.6913	0.6851	0.7086	0.6782	0.6771	0.6547
210	0.7259	0.8496	0.8246	0.7153	0.7673	0.7207	0.7395	0.7606	0.7766	0.7974	0.7282	0.717	0.8189	0.7772	0.7331	0.7662	0.7669	0.713	0.7256	0.6936	0.7664	0.7177	0.6421	0.756	0.6877	0.7479	0.7119	0.7368	0.7101	0.6717	0.6925	0.6728
240	0.8194	1.063	0.9935	0.8471	0.9248	0.8002	0.8414	0.8759	0.8831	1.088	0.8681	0.8748	1.047	0.9347	0.8707	0.8504	0.7899	0.7491	0.7123	0.7297	0.7588	0.7384	0.7064	0.7353	0.7314	0.7092	0.7529	0.7631	0.7375	0.7362	0.7169	0.6964
270	0.9933	1.526	1.292	1.03	1.239	1.055	1.061	1.093	1.231	1.483	1.106	1.198	1.485	1.215	1.053	1.139	0.8493	0.7544	0.7395	0.7346	0.779	0.7559	0.7465	0.7631	0.7596	0.7612	0.7856	0.8045	0.7882	0.7426	0.7139	0.7168
300	1.301	2.268	1.902	1.415	1.858	1.443	1.412	1.524	1.701	2.318	1.55	1.7	2.191	1.748	1.474	1.609	0.9332	0.8122	0.7749	0.7575	0.8262	0.8219	0.7978	0.8175	0.7973	0.8285	0.8135	0.8971	0.8302	0.8	0.8076	0.7385
330	1.839	3.127	2.568	2.059	2.778	2.091	1.992	1.957	2.5	3.402	2.284	2.409	2.966	2.458	2.056	2.134	1.1	0.9004	0.8674	0.8254	0.9204	0.8672	0.8862	0.8899	0.8915	0.9064	0.9416	1.068	0.928	0.9196	0.8924	0.7965
360	2.488	3.995	3.368	2.771	3.799	2.811	2.641	2.509	3.3	4.687	3.133	3.21	3.8	3.263	2.789	2.653	1.34	1.088	0.9544	0.9864	1.089	1	1.04	1.016	1.08	1.059	1.105	1.251	1.141	1.164	1.101	0.9253
390	3.073	4.756	4.132	3.544	4.794	3.535	3.333	2.986	4.006	6.335	4.007	4.026	4.427	4.045	3.418	3.238	1.736	1.362	1.201	1.199	1.353	1.24	1.288	1.28	1.384	1.351	1.462	1.707	1.542	1.57	1.487	1.115
420	3.64	5.548	4.877	4.172	5.898	4.132	4.057	3.556	4.711	7.84	4.942	5.457	5.13	4.729	4.263	3.784	2.252	1.856	1.579	1.576	1.791	1.645	1.733	1.601	1.805	1.756	1.937	2.358	2.171	2.056	2.105	1.462
450	4.171	6.305	5.647	5.126	7.034	4.875	4.799	4.278	5.309	9.253	5.749	7.178	5.807	5.471	4.976	4.427	2.87	2.416	1.995	2.074	2.232	2.173	2.076	2.132	2.435	2.352	2.541	3.201	2.986	2.604	2.922	2.012
480	4.781	7.122	6.292	5.856	7.925	5.619	5.595	4.838	5.886	10.89	6.538	9.6	6.465	6.126	5.761	5.104	3.339	2.984	2.548	2.671	2.785	2.707	2.513	2.623	2.959	2.868	3.019	3.94	3.996	3.099	3.905	2.665
510	5.512	7.815	6.975	6.69	9.004	6.429	6.321	5.66	6.333	12.45	7.393	12.65	7.256	6.74	6.549	5.702	3.817	3.517	2.817	3.061	3.23	3.063	2.892	2.991	3.473	3.345	3.446	4.573	4.912	3.647	4.741	3.176
540	6.161	8.565	7.643	7.679	10.06	7.14	7.156	6.266	7.014	13.92	8.184	15.79	7.888	7.421	7.298	6.514	4.215	3.927	3.221	3.472	3.608	3.381	3.291	3.352	3.934	3.644	3.784	5.066	5.807	4.151	5.617	3.744
570	7.02	9.143	8.267	8.721	11.27	7.903	7.868	7.038	7.549	15.54	9	19.73	8.6	8.004	8.13	7.226	4.718	4.271	3.526	3.774	3.934	3.68	3.673	3.591	4.336	4.027	4.076	5.535	6.474	4.608	6.438	4.412
600	7.861	9.786	8.794	9.517	12.24	8.758	8.715	7.642	8.118	16.93	9.604	22.81	9.395	8.53	8.773	7.75	4.995	4.758	3.847	4.202	4.389	3.92	4.078	3.915	4.846	4.479	4.398	5.962	7.234	5.242	7.358	4.927
630	8.433	10.15	9.133	10.23	13.13	9.333	9.28	8.232	8.318	18.06	10.15	26.1	9.826	9.052	9.406	8.332	5.353	5.094	4.183	4.435	4.705	4.208	4.703	4.255	5.372	4.858	4.828	6.337	7.871	5.814	8.187	5.567
660	9.027	10.54	9.447	10.91	13.76	9.863	9.802	8.542	8.672	18.8	10.55	28.99	10.11	9.399	9.893	8.689	5.645	5.487	4.561	4.965	5.18	4.456	5.139	4.692	6.007	5.195	5.156	6.942	8.668	6.491	9.022	6.068
690	9.337	10.71	9.578	11.41	14.33	10.43	10.37	9.006	8.996	19.11	10.98	31.9	10.38	9.68	10.23	9.196	5.82	5.829	4.789	5.316	5.601	4.845	5.647	4.995	6.528	5.555	5.378	7.203	9.476	7.158	9.916	6.754
720	10	10.98	9.81	11.89	14.74	10.76	10.75	9.351	9.195	19.26	11.28	34.46	10.85	9.872	10.55	9.474	6.137	6.111	5.133	5.548	5.896	5.066	6.205	5.241	6.979	5.85	5.676	7.638	10.03	7.633	10.78	7.525
750	10.41	11.51	10.05	12.28	15.24	11	11.06	9.984	9.391	19.68	11.55	37.91	11.05	10.1	10.87	9.769	6.302	6.346	5.274	5.83	6.112	5.206	6.685	5.394	7.397	6.081	5.896	7.724	10.6	8.231	11.35	7.998
780	10.87	12.11	10.32	12.7	15.75	11.31	11.35	10.52	9.742	19.95	11.93	41.24	11.33	10.45	11.29	10.17	6.244	6.533	5.402	6.02	6.394	5.284	7.514	5.462	7.704	6.209	5.958	8.007	10.84	8.644	12.02	8.646
810	11.47	12.3	10.6	13.37	16.18	11.6	11.76	10.86	10.15	20.31	12.42	43.48	11.77	10.78	11.8	10.68	6.305	6.565	5.588	6.247	6.518	5.422	7.768	5.589	7.931	6.295	6.045	8.04	11.25	9.189	12.47	9.035
840	12.13	12.88	11.07	13.82	16.99	12.1	12.24	11.28	10.57	20.84	12.78	46.4	12.28	11.35	12.32	11.12	6.342	6.841	5.701	6.357	6.653	5.504	8.126	5.687	8.308	6.539	6.311	8.287	11.51	9.474	13.08	9.467
870	12.51	13.26	11.35	14.26	17.33	12.43	12.69	11.69	11	21.08	13.19	50.19	12.4	11.66	12.65	11.32	6.388	6.892	5.837	6.604	6.759	5.593	8.666	5.939	8.647	6.716	6.389	8.326	11.81	9.853	13.67	9.954
900	12.95	13.7	11.65	14.65	18.02	12.86	13.16	12.17	11.36	21.61	13.59	52.65	12.93	12.23	12.96	11.78	6.379	7.043	5.836	6.846	7.034	5.611	8.609	6.02	8.9	6.781	6.434	8.501	12.02	10.04	13.92	10.45
930	13.36	14.04	11.82	14.79	18.17	13.13	13.52	12.55	11.77	21.85	13.66	54.36	13.19	12.44	13.26	12.03	6.484	7.265	6.043	7.206	7.24	5.707	8.975	6.228	9.286	6.943	6.523	8.84	12.49	10.47	14.49	10.87
n=16
OD600
Time (min)	BY4741 pGAL1::YFP																BY4741 pGAL1::YFP +SICLOPPS:G4CP2
0	0.1689	0.2953	0.2475	0.1799	0.2316	0.2005	0.1955	0.2281	0.2189	0.283	0.2169	0.2584	0.2935	0.2179	0.2018	0.2297	0.3625	0.2225	0.1942	0.2062	0.2213	0.1856	0.2476	0.2114	0.2188	0.2195	0.271	0.2836	0.1892	0.2424	0.2398	0.1805
30	0.1927	0.3241	0.2709	0.2037	0.2672	0.2316	0.2301	0.2556	0.2597	0.3495	0.2439	0.34	0.3328	0.2495	0.2344	0.2541	0.3683	0.2455	0.2113	0.2227	0.2391	0.2078	0.318	0.2256	0.2312	0.2295	0.2848	0.2973	0.2102	0.2864	0.2728	0.1907
60	0.2165	0.3488	0.2863	0.2275	0.2913	0.2543	0.2537	0.2742	0.2931	0.3664	0.2717	0.338	0.3572	0.2742	0.2574	0.2691	0.3717	0.2618	0.2254	0.2374	0.2572	0.2329	0.3361	0.2412	0.2439	0.2453	0.3022	0.3167	0.2341	0.3207	0.2956	0.2058
90	0.2377	0.3725	0.3024	0.2486	0.3087	0.2748	0.2767	0.2897	0.3153	0.3777	0.291	0.3665	0.3789	0.2943	0.2743	0.2805	0.3779	0.2761	0.2389	0.2494	0.2739	0.2542	0.3584	0.2557	0.257	0.26	0.3183	0.3339	0.2535	0.3454	0.3162	0.2223
120	0.2595	0.3981	0.3254	0.2725	0.3318	0.2956	0.3037	0.3064	0.3404	0.3938	0.3118	0.4369	0.4058	0.314	0.2917	0.2984	0.3893	0.2945	0.2411	0.2656	0.2899	0.2761	0.3806	0.2703	0.2718	0.2764	0.3374	0.3531	0.2754	0.3694	0.3349	0.2406
150	0.2827	0.4274	0.3468	0.2956	0.3612	0.3252	0.3286	0.3302	0.3631	0.419	0.3327	0.4996	0.4363	0.3383	0.3142	0.318	0.4073	0.312	0.2487	0.2823	0.3082	0.2951	0.4047	0.2866	0.2919	0.2964	0.3611	0.3739	0.3017	0.3887	0.3559	0.2614
180	0.3087	0.4652	0.3772	0.3273	0.4	0.3595	0.3563	0.359	0.389	0.4526	0.357	0.5741	0.4774	0.3703	0.3383	0.3446	0.4282	0.3369	0.2677	0.3035	0.3312	0.3173	0.4495	0.3068	0.3112	0.3193	0.3867	0.4003	0.3316	0.4108	0.379	0.2859
210	0.3394	0.4995	0.4129	0.3639	0.4385	0.3985	0.3848	0.3901	0.416	0.4879	0.3838	0.6369	0.5172	0.4054	0.3669	0.3752	0.4528	0.3614	0.29	0.3273	0.355	0.3444	0.4852	0.3303	0.3315	0.3457	0.4157	0.4345	0.3638	0.4378	0.4067	0.3092
240	0.3755	0.5312	0.4446	0.3997	0.4789	0.4413	0.4182	0.4215	0.447	0.5232	0.4195	0.6854	0.5538	0.4437	0.3979	0.4058	0.48	0.3931	0.3168	0.3499	0.3828	0.3729	0.5436	0.3581	0.3554	0.3718	0.4469	0.4663	0.3999	0.475	0.4377	0.3343
270	0.4064	0.5577	0.4751	0.4331	0.5195	0.4714	0.4479	0.4502	0.4731	0.5528	0.4482	0.7336	0.5846	0.473	0.4227	0.4372	0.5116	0.425	0.3478	0.3756	0.4132	0.4043	0.5243	0.3867	0.3851	0.4009	0.4796	0.501	0.4385	0.511	0.473	0.3639
300	0.4277	0.5775	0.5006	0.4576	0.5479	0.4939	0.4735	0.4717	0.4911	0.5719	0.4763	0.7707	0.6063	0.4967	0.443	0.4592	0.5429	0.4644	0.3834	0.405	0.4423	0.4372	0.5461	0.416	0.411	0.4337	0.516	0.5353	0.4786	0.5511	0.5131	0.3951
330	0.4468	0.593	0.5211	0.4764	0.5699	0.513	0.4896	0.4897	0.5042	0.5826	0.4958	0.7792	0.625	0.5138	0.4606	0.4784	0.5702	0.5016	0.4202	0.4377	0.474	0.471	0.5754	0.4461	0.442	0.4667	0.5518	0.575	0.517	0.5807	0.556	0.4287
360	0.4624	0.6081	0.5411	0.4922	0.5906	0.5319	0.5069	0.5083	0.5188	0.5929	0.5166	0.7885	0.6417	0.5313	0.4786	0.4983	0.5973	0.5335	0.4551	0.4682	0.5037	0.5043	0.6049	0.4755	0.4731	0.499	0.584	0.6072	0.5543	0.6179	0.5951	0.4641
390	0.4829	0.6251	0.5609	0.5127	0.6096	0.547	0.5231	0.5243	0.536	0.6037	0.5368	0.8024	0.661	0.547	0.4997	0.5176	0.617	0.5611	0.4807	0.4976	0.5291	0.5331	0.6209	0.5013	0.4986	0.5278	0.6098	0.6379	0.5869	0.6465	0.6284	0.4964
420	0.502	0.6412	0.585	0.5318	0.631	0.5603	0.5397	0.5444	0.5501	0.6186	0.5559	0.7882	0.6754	0.5645	0.5191	0.535	0.6324	0.5813	0.5016	0.5195	0.5454	0.555	0.6705	0.5196	0.5179	0.5491	0.6276	0.6565	0.6107	0.6668	0.6504	0.5229
450	0.5201	0.6583	0.6071	0.5527	0.6514	0.5754	0.5555	0.5645	0.5675	0.6397	0.5739	0.8026	0.6917	0.5797	0.5414	0.552	0.6439	0.5949	0.5152	0.5366	0.5597	0.5701	0.6585	0.5331	0.5351	0.5647	0.6416	0.6719	0.6282	0.6828	0.6655	0.5414
480	0.54	0.6761	0.6246	0.5754	0.6731	0.5902	0.5739	0.581	0.5845	0.6569	0.5934	0.8232	0.7102	0.5967	0.5632	0.5721	0.6548	0.6083	0.5307	0.5518	0.5712	0.5828	0.6879	0.5451	0.5487	0.5804	0.6538	0.6895	0.6453	0.7	0.6824	0.5557
510	0.5565	0.695	0.6441	0.5998	0.6942	0.6022	0.5922	0.5961	0.6038	0.6727	0.6145	0.8388	0.7251	0.6113	0.5855	0.588	0.6641	0.6209	0.5422	0.5678	0.5843	0.5963	0.6897	0.5569	0.5638	0.5946	0.6683	0.7031	0.66	0.7125	0.6983	0.5712
540	0.5761	0.7144	0.6631	0.6261	0.7162	0.6187	0.6124	0.613	0.62	0.691	0.6348	0.8552	0.743	0.6276	0.6083	0.609	0.6748	0.6327	0.5569	0.5812	0.5978	0.6095	0.7057	0.5699	0.5745	0.6095	0.6783	0.7199	0.6782	0.7266	0.7139	0.5848
570	0.5975	0.7332	0.6807	0.6551	0.7404	0.6336	0.6328	0.6332	0.6392	0.7078	0.6566	0.8665	0.7612	0.6434	0.6291	0.6267	0.6838	0.646	0.5638	0.5931	0.6114	0.6238	0.691	0.581	0.5886	0.6249	0.6897	0.7345	0.6945	0.7399	0.7299	0.6008
600	0.6172	0.7512	0.6994	0.6821	0.7627	0.6504	0.6532	0.6508	0.6566	0.7284	0.6781	0.885	0.7773	0.6603	0.6526	0.6472	0.6971	0.6576	0.5837	0.6054	0.624	0.6362	0.6652	0.5928	0.6006	0.6389	0.7027	0.7467	0.7125	0.7552	0.7467	0.6179
630	0.6363	0.7663	0.7143	0.7052	0.781	0.6646	0.6708	0.6659	0.6718	0.7439	0.6949	0.8929	0.7947	0.675	0.6749	0.6653	0.7075	0.6714	0.6012	0.6184	0.6362	0.6512	0.6509	0.605	0.6173	0.6545	0.7157	0.7632	0.7281	0.7708	0.7624	0.6337
660	0.652	0.7817	0.7257	0.7229	0.7961	0.6762	0.6865	0.6793	0.6843	0.759	0.7111	0.8959	0.8052	0.6881	0.6928	0.6812	0.7185	0.6865	0.6179	0.633	0.6512	0.6646	0.6295	0.6188	0.6301	0.671	0.7276	0.7779	0.747	0.7876	0.7786	0.6525
690	0.6632	0.7937	0.7388	0.7403	0.808	0.6846	0.6981	0.6895	0.6942	0.7732	0.725	0.9073	0.8152	0.6977	0.7085	0.6915	0.7291	0.7007	0.6297	0.6491	0.6651	0.6818	0.6341	0.631	0.6445	0.6855	0.741	0.7929	0.7643	0.8038	0.7948	0.6696
720	0.6733	0.8045	0.7491	0.7515	0.8152	0.6919	0.7059	0.6949	0.7024	0.7826	0.7366	0.9141	0.8219	0.7035	0.7211	0.7005	0.7384	0.716	0.6499	0.6629	0.6782	0.6967	0.6485	0.6449	0.6595	0.7006	0.7527	0.8059	0.779	0.8148	0.8096	0.6895
750	0.6807	0.8147	0.7558	0.758	0.8194	0.6964	0.711	0.7005	0.7095	0.7903	0.7446	0.9182	0.8306	0.711	0.7331	0.7099	0.7495	0.7295	0.6596	0.6773	0.6893	0.7096	0.6413	0.6561	0.6728	0.7146	0.7629	0.8168	0.7959	0.8275	0.8231	0.7041
780	0.685	0.8223	0.7633	0.7651	0.8253	0.6985	0.7136	0.7046	0.7146	0.7937	0.7531	0.9192	0.8317	0.7138	0.742	0.7132	0.7563	0.7422	0.6702	0.69	0.6983	0.7211	0.6645	0.6654	0.6858	0.7268	0.7737	0.8285	0.8079	0.837	0.8359	0.7196
810	0.6876	0.8282	0.7714	0.771	0.8283	0.7008	0.7172	0.7085	0.7182	0.7973	0.7604	0.9256	0.8344	0.7191	0.7496	0.7181	0.7631	0.7529	0.6806	0.7013	0.7059	0.7294	0.6702	0.6734	0.6958	0.7346	0.7803	0.8368	0.8186	0.8443	0.8452	0.7337
840	0.6916	0.8331	0.7785	0.7743	0.8326	0.7036	0.7205	0.7128	0.7232	0.8021	0.7672	0.9364	0.8372	0.7234	0.7557	0.723	0.7673	0.762	0.6867	0.7103	0.7123	0.7362	0.6306	0.6798	0.7018	0.7421	0.7863	0.842	0.8258	0.8475	0.8556	0.7433
870	0.6948	0.8379	0.7839	0.7784	0.832	0.7034	0.72	0.7122	0.7258	0.8035	0.7731	0.933	0.8418	0.7257	0.7618	0.7273	0.7691	0.7681	0.6953	0.7179	0.7176	0.7411	0.6554	0.6855	0.7079	0.7505	0.7909	0.8487	0.8323	0.8503	0.862	0.7521
900	0.6955	0.843	0.7878	0.7817	0.8334	0.7049	0.7219	0.7135	0.7287	0.806	0.7767	0.9405	0.8468	0.727	0.7656	0.7323	0.7739	0.7733	0.7013	0.7232	0.7197	0.7449	0.6123	0.6892	0.7101	0.7526	0.7941	0.8493	0.8385	0.8515	0.8673	0.7589
930	0.6963	0.8458	0.7919	0.7836	0.8361	0.7047	0.7253	0.7164	0.7323	0.8082	0.7793	0.9381	0.8457	0.729	0.7659	0.7318	0.7713	0.777	0.7017	0.7288	0.7225	0.747	0.6149	0.6908	0.7157	0.7587	0.7989	0.8541	0.8406	0.8521	0.8715	0.7637

## Sheet: SICLOPPS Gal 0.1 Glu 0.01
Supplementary Dataset 5
Raw data for the fluorescence measurment over time of BY4741 pGAL1::YFP expressing or not SICLOPPS-based G4CP2
Gal/Glu=10:1		Gal 0.1%+Glu 0.01%
n=16
YFP/OD
Time (min)	BY4741 pGAL1::YFP																BY4741 pGAL1::YFP +SICLOPPS:G4CP2
0	2.48158	1.91925	3.30349	3.86287	2.29217	2.35454	2.60077	3.08754	2.42879	1.44128	2.53474	1.94382	2.28218	2.70356	3.37441	2.51385	2.24849	2.32433	2.99409	2.85027	2.42396	2.56416	2.98775	1.9393	2.27403	2.97866	2.50221	2.23968	2.8655	1.76244	3.57493	2.31321
30	2.33793	1.73984	2.91929	2.96303	2.05631	2.21438	2.52606	2.57789	2.1781	1.33326	2.18315	1.83873	1.96702	2.49671	3.36774	2.29551	2.15083	2.37809	2.93699	2.91418	2.41799	2.43872	2.87765	1.95653	2.12356	3.10915	2.35595	2.08694	2.6503	1.72518	3.00983	2.18081
60	2.24251	1.68119	2.54755	2.71388	1.98165	1.99554	2.2703	2.3182	2.14619	1.35889	2.07036	1.78803	1.9279	2.36852	3.00409	2.15988	2.09168	2.27831	2.7312	2.81216	2.3821	2.25606	2.67223	1.91821	2.05579	2.99694	2.36486	2.08068	2.56105	1.67292	2.96988	2.0276
90	2.12646	1.6117	2.29959	2.33113	2.06737	1.9071	2.04473	2.18013	2.23753	1.31815	1.92078	1.71772	1.86819	2.29428	2.89726	2.12857	2.04531	2.15459	2.55754	2.63547	2.24793	2.22346	2.56533	1.7074	1.92501	2.84237	2.27469	2.11241	2.40509	1.67037	2.79769	1.89093
120	2.16218	1.66107	2.05954	2.22151	1.97062	1.93763	2.09083	2.20517	2.1843	1.4145	1.90283	1.68813	1.83568	2.18943	2.71076	2.01524	1.88685	2.07424	2.47626	2.54896	2.16087	2.09215	2.48976	1.68601	1.89117	2.84401	2.25154	1.95078	2.34848	1.4829	2.67181	1.84732
150	2.01686	1.70746	2.08201	2.21918	2.11085	2.03742	1.94007	2.04914	2.14976	1.60741	1.9115	1.7375	1.92881	2.15459	2.53604	2.09591	1.83437	1.92547	2.37882	2.2836	2.13818	2.00563	2.28266	1.58261	1.84889	2.73465	2.0903	1.79591	2.1699	1.50231	2.58424	1.81524
180	2.12119	2.16753	2.22365	2.38981	2.30314	2.31866	2.13286	2.34682	2.25604	2.09442	2.16868	2.12523	2.10517	2.22599	2.53851	2.4177	1.72769	1.82953	2.21731	2.22293	2.02235	1.88883	2.2754	1.56183	1.81576	2.54508	2.00606	1.67158	1.99373	1.46095	2.46278	1.76671
210	2.85497	2.95528	2.6787	3.11269	2.88281	3.17038	2.53137	2.96306	3.01362	3.00705	3.08187	2.99374	2.8619	2.58323	2.96932	3.29363	1.77742	1.70881	2.15459	2.14626	1.94815	1.87044	2.04763	1.54224	1.78911	2.35449	1.95548	1.74725	1.92909	1.47326	2.31087	1.74266
240	3.84023	4.20606	3.95484	4.41371	4.08382	4.75425	3.54448	4.15531	4.01566	4.43547	4.54266	4.66984	3.98414	3.58893	3.83367	4.80809	1.78542	1.71879	2.08329	1.99295	1.90358	1.75302	1.99641	1.56858	1.8077	2.38234	1.95021	1.83034	1.85016	1.55013	2.23658	1.8025
270	5.25673	5.82665	5.69859	6.2386	5.98819	7.21215	5.07898	5.78275	5.63863	6.05766	6.69575	7.0921	5.65818	5.13406	5.3863	6.67776	1.88893	1.77709	2.06533	1.96935	1.91114	1.88554	2.09517	1.67858	1.98627	2.31188	1.997	1.83366	1.99093	1.71872	2.28181	1.86815
300	6.80431	7.44215	8.24103	8.23384	8.66332	10.1787	6.95986	7.48654	7.69918	7.97897	9.64197	10.214	7.44775	6.99734	7.8033	9.079	2.02269	2.00486	2.2331	2.14835	2.11313	2.08068	2.3557	2.13244	2.36049	2.47482	2.20808	2.15461	2.20346	2.22088	2.33738	2.17792
330	8.33551	9.19635	10.6954	10.2321	11.9041	13.9684	8.94209	9.50673	9.74602	9.53604	13.2196	13.5822	9.22558	9.02816	10.2703	11.1844	2.68932	2.4808	2.54893	2.36737	2.5531	2.52213	2.80875	2.85199	3.04178	2.60129	2.5691	2.82977	2.69073	2.88973	2.85477	2.74751
360	10.1881	10.9569	13.6079	12.125	16.0612	17.6904	11.1083	10.8531	11.9049	10.7948	16.6994	17	10.7967	10.8897	12.794	12.864	3.51201	3.35697	3.31116	2.97543	3.29604	3.39804	3.61317	3.78304	3.9451	3.2705	3.39178	3.76087	3.71498	3.97005	3.70213	3.77099
390	11.7504	12.5788	15.6926	13.8917	19.7519	21.2085	12.7269	12.495	13.9002	12.1106	20.0721	20.0747	12.1482	12.5874	14.7438	14.25	4.57654	4.65567	4.34701	3.97044	4.34961	4.49209	4.9799	4.82733	5.03112	4.35018	4.38211	5.03742	4.97807	5.03377	5.02169	4.91997
420	13.3235	14.3197	17.8436	15.559	23.318	24.6761	14.1725	13.9639	16.1514	13.2738	22.9921	23.2928	13.2623	14.0325	16.4505	15.6505	5.35272	5.78714	5.56164	5.38569	5.38138	5.58829	6.26845	5.62862	5.9451	6.08824	5.44381	5.83782	6.1656	5.98087	6.53048	6.02693
450	14.6712	15.9314	20.1589	16.8768	26.9424	27.7612	15.658	15.8772	17.9452	14.5291	25.7192	26.1026	14.3664	15.705	18.4788	16.5997	6.24179	6.66774	6.74373	6.52343	6.3097	6.82181	7.36439	6.28045	6.8541	8.06374	6.60572	6.67489	7.16333	6.76331	7.95783	7.08112
480	16.4661	17.7183	21.6652	18.5416	30.8019	30.8357	17.1375	17.4129	19.7981	15.5692	28.5533	28.4023	15.2406	16.9772	19.8956	17.9562	6.74503	7.41733	7.53819	7.81474	7.01057	7.56858	8.09961	6.81875	7.48143	9.94895	7.31247	7.33383	8.15374	7.49128	9.31155	7.96051
510	17.8727	19.1756	23.2756	19.926	33.6746	33.8962	18.7656	19.03	22.0876	16.6457	30.8359	31.0873	15.9714	18.3075	21.2234	18.777	7.2032	7.97055	8.24981	8.61361	7.61811	8.21814	8.8173	7.37185	8.08156	11.8558	8.16815	7.8626	8.75164	7.99822	10.4615	8.90964
540	19.0428	20.7496	24.2623	20.7524	36.4763	36.1013	19.833	20.3535	24.0781	17.425	33.0443	33.296	16.5833	19.3312	22.4573	19.4301	7.7535	8.59731	9.11327	9.34194	8.23274	8.76257	9.67633	7.77985	8.51466	13.5461	8.69044	8.46661	9.22022	8.35601	11.3157	9.6014
570	19.8629	22.1206	25.0115	21.595	38.1273	37.8808	20.7345	20.9814	25.3528	17.9043	34.114	34.6814	17.1352	20.2735	23.2865	20.1785	8.56571	8.94128	9.49678	10.2417	8.70787	9.42392	10.0017	8.34809	8.99008	15.1147	9.14988	9.08545	9.74903	8.89324	12.4643	10.4459
600	20.3041	22.5707	25.7596	22.1414	39.5214	38.6692	21.2555	21.9958	25.9327	18.3161	35.0753	35.4882	17.1043	20.905	23.4728	20.0731	8.78144	9.25486	10.0905	10.6834	8.95034	9.95005	10.5461	8.67619	9.40032	16.5927	9.8345	9.69176	10.182	9.22671	13.6453	11.0884
630	20.887	23.3308	26.1017	22.4246	40.0357	39.2621	21.8445	22.5125	26.5062	18.9307	35.2753	35.7715	17.0592	21.1471	23.723	20.5895	9.17342	9.6858	10.5368	11.3764	9.4025	10.3591	11.0069	9.16907	9.50919	17.8785	10.2559	10.1424	10.4834	9.62836	14.5125	12.0675
660	21.3896	23.4866	26.6307	22.6607	40.0412	38.9751	21.8261	22.8224	26.9984	19.0954	35.7764	35.8461	17.0641	21.4243	23.7583	20.3879	9.3262	9.62143	10.6298	11.8679	9.80626	10.4289	11.0941	9.35951	9.67589	18.8993	10.7782	10.5596	10.5583	9.82691	15.448	12.7748
690	22.2472	24.1848	27.8575	23.3076	40.0779	39.0298	22.2635	23.7233	27.2615	19.3936	35.2162	35.7235	17.1622	21.7134	23.7578	20.7471	9.5612	9.86287	10.708	12.231	9.78816	10.5428	11.2099	9.53755	9.67786	19.5506	10.8429	10.74	10.8027	9.86259	15.9471	12.9746
720	22.7793	24.8786	28.9521	24.0637	40.3511	39.4559	22.7485	24.687	28.2423	19.7085	35.609	36.0051	17.5022	22.3473	24.487	21.204	9.47956	9.77086	10.821	12.4348	9.6932	10.5598	11.2034	9.53023	9.90008	20.0457	10.9855	10.9522	10.9037	9.83681	16.6148	13.3617
750	23.7829	25.4245	29.8776	24.9629	40.7158	40.1721	23.689	25.6679	29.1294	20.47	36.2796	36.3117	17.7797	22.7312	24.6953	21.4715	9.52493	9.66235	10.8436	12.5431	9.72176	10.6089	11.0932	9.71435	9.67643	20.3857	11.0359	11.0143	10.8663	9.69435	16.9773	13.7403
780	24.8246	26.3416	30.9609	26.0404	41.1042	40.5292	23.92	26.3298	29.973	21.0092	36.8959	36.8681	18.2992	23.3746	25.1561	22.1439	9.60669	9.67667	10.7318	12.8703	9.74309	10.8246	11.0572	9.96828	9.6861	20.7388	10.9981	11.2038	10.7447	9.85604	17.4	13.8948
810	25.8027	26.945	31.6449	26.6383	42.2898	41.2644	24.6004	26.9727	31.0906	21.4444	37.2372	37.2879	18.8472	24.04	25.3072	22.6348	9.68566	9.74369	10.9006	13.1381	9.85817	10.8231	11.2491	10.2547	9.74335	20.8353	11.1503	11.421	10.9586	10.0122	17.7113	14.1967
840	26.4527	27.304	32.319	27.1546	42.5503	42.0985	24.9965	27.6663	31.6437	21.8819	37.9929	37.7921	19.3132	24.7725	26.0183	23.5929	9.88312	9.84641	10.7643	13.4178	9.91834	11.0634	11.2842	10.5184	9.95173	21.2084	11.441	11.7967	10.9326	9.94248	18.2735	14.6279
870	27.0675	28.0341	33.459	28.0518	43.3657	42.7433	25.7542	28.3723	32.3443	22.5134	38.1514	38.1559	19.5815	25.0957	26.3408	23.6208	10.2029	9.96179	11.084	13.8317	9.99852	11.1887	11.3908	10.7603	9.88586	21.3018	11.5012	12.1466	11.1153	10.1357	18.9208	15.2568
900	27.5734	28.4269	33.8708	28.2551	43.6051	43.0112	25.5917	28.5809	32.4459	22.8881	38.628	38.4664	19.9436	25.4338	26.4819	24.1416	10.5106	10.1583	11.4525	14.4468	10.2287	11.3745	11.6408	10.9707	10.0389	21.7556	11.7278	12.5892	11.2458	10.4888	19.5981	15.8875
930	27.9573	28.3671	34.4902	28.6745	43.8966	43.1911	25.9448	28.5262	33.2064	22.8287	38.8323	38.3926	20.1125	26.0415	26.6287	24.7133	10.8296	10.2933	11.5914	14.84	10.6109	11.6572	11.8005	11.5446	10.3841	22.3508	12.1247	13.1126	11.4243	10.5695	20.4191	16.4805
n=16
YFP
Time (min)	BY4741 pGAL1::YFP																BY4741 pGAL1::YFP +SICLOPPS:G4CP2
0	0.6266	0.5871	0.6161	0.6648	0.5939	0.607	0.6091	0.6419	0.6208	0.6333	0.6385	0.5917	0.6454	0.6448	0.6462	0.6536	0.6696	0.6457	0.6584	0.6282	0.6455	0.6554	0.6827	0.6262	0.6979	0.6422	0.6801	0.6728	0.6903	0.6484	0.6846	0.6551
30	0.6275	0.6119	0.6221	0.6412	0.6171	0.6497	0.6737	0.6156	0.6286	0.6397	0.6246	0.6191	0.6084	0.6444	0.6786	0.6494	0.6745	0.6837	0.6899	0.6554	0.6693	0.6487	0.6797	0.6617	0.6823	0.6865	0.6771	0.6361	0.6692	0.6654	0.6432	0.6887
60	0.6436	0.6249	0.6188	0.6763	0.6157	0.6262	0.6543	0.6229	0.6254	0.6664	0.6356	0.6453	0.6337	0.6575	0.6618	0.6579	0.6867	0.6942	0.6828	0.6707	0.692	0.6326	0.6726	0.6825	0.6965	0.6866	0.7026	0.6654	0.6838	0.6782	0.6902	0.6758
90	0.6373	0.6284	0.6225	0.6336	0.6506	0.6261	0.6263	0.6233	0.6594	0.6596	0.6183	0.6438	0.6449	0.6658	0.6881	0.6854	0.7042	0.6899	0.6734	0.6673	0.6782	0.6577	0.6852	0.6413	0.6803	0.6762	0.7072	0.7066	0.6804	0.7074	0.6776	0.6675
120	0.6826	0.6832	0.6296	0.6589	0.6373	0.671	0.686	0.6825	0.6649	0.7238	0.6521	0.6712	0.6636	0.675	0.6926	0.6876	0.6887	0.7069	0.6884	0.6872	0.6837	0.6584	0.7051	0.6739	0.7003	0.6928	0.7331	0.6857	0.7184	0.6633	0.6928	0.6848
150	0.6817	0.7465	0.7058	0.7128	0.7084	0.7459	0.6831	0.6797	0.6804	0.8508	0.6998	0.7261	0.737	0.7108	0.7002	0.7692	0.7099	0.7053	0.7077	0.6627	0.7118	0.6763	0.6937	0.6753	0.7268	0.6946	0.713	0.6758	0.7037	0.716	0.7148	0.6956
180	0.7789	1.004	0.8332	0.8393	0.8137	0.9059	0.8075	0.8411	0.756	1.149	0.8434	0.9368	0.8427	0.8018	0.7613	0.94	0.7087	0.7212	0.7071	0.698	0.7149	0.6915	0.7502	0.7186	0.7559	0.6859	0.7278	0.68	0.7	0.7426	0.7312	0.7111
210	1.126	1.454	1.083	1.185	1.075	1.31	1.029	1.139	1.062	1.705	1.246	1.387	1.202	0.9948	0.9582	1.355	0.7746	0.7312	0.7401	0.7293	0.7364	0.7435	0.7351	0.7668	0.7949	0.6788	0.7511	0.7625	0.7373	0.8016	0.7337	0.7422
240	1.596	2.18	1.699	1.803	1.598	2.041	1.522	1.707	1.487	2.581	1.922	2.256	1.759	1.465	1.323	2.092	0.8304	0.7958	0.7729	0.7354	0.77	0.7552	0.7788	0.8428	0.8592	0.7421	0.7951	0.8674	0.7717	0.9045	0.7582	0.8223
270	2.283	3.126	2.541	2.667	2.433	3.182	2.283	2.534	2.172	3.614	2.916	3.573	2.579	2.202	1.973	3.011	0.932	0.8889	0.8251	0.784	0.8302	0.883	0.8762	0.9724	1.013	0.7724	0.8661	0.9381	0.8997	1.073	0.8356	0.921
300	3.032	4.117	3.631	3.655	3.623	4.614	3.26	3.476	3.102	4.856	4.282	5.346	3.528	3.16	3.023	4.229	1.052	1.072	0.9513	0.9167	0.9769	1.047	1.053	1.301	1.269	0.8944	1.006	1.179	1.07	1.468	0.9242	1.158
330	3.821	5.241	4.783	4.762	5.114	6.533	4.37	4.664	4.106	5.94	6.007	7.405	4.515	4.264	4.18	5.392	1.456	1.389	1.146	1.071	1.238	1.339	1.31	1.819	1.711	1.008	1.227	1.639	1.379	1.989	1.203	1.543
360	4.821	6.435	6.129	5.917	7.144	8.548	5.633	5.623	5.206	6.845	7.817	9.656	5.448	5.373	5.472	6.423	1.959	1.941	1.543	1.405	1.65	1.873	1.756	2.49	2.285	1.336	1.683	2.249	1.976	2.81	1.653	2.246
390	5.753	7.658	7.432	7.132	9.076	10.6	6.674	6.846	6.326	7.861	9.743	11.82	6.328	6.48	6.648	7.343	2.61	2.765	2.087	1.934	2.227	2.556	2.477	3.257	2.991	1.851	2.234	3.096	2.724	3.652	2.315	3.043
420	6.771	9.03	8.92	8.419	11.16	12.76	7.69	8.053	7.638	8.851	11.68	14.36	7.155	7.52	7.763	8.373	3.111	3.518	2.743	2.688	2.815	3.263	3.185	3.886	3.595	2.677	2.858	3.686	3.47	4.439	3.117	3.85
450	7.786	10.4	10.4	9.586	13.42	14.88	8.828	9.566	8.838	9.919	13.59	16.69	8.061	8.721	9.123	9.251	3.707	4.154	3.413	3.355	3.382	4.104	3.842	4.434	4.242	3.669	3.577	4.328	4.149	5.132	3.963	4.67
480	9.086	11.99	11.97	11.01	15.94	17.12	9.974	10.89	10.2	10.9	15.79	18.95	8.867	9.767	10.29	10.42	4.103	4.733	3.898	4.134	3.846	4.663	4.326	4.917	4.735	4.677	4.065	4.877	4.858	5.796	4.815	5.402
510	10.25	13.49	13.7	12.38	18.09	19.47	11.28	12.32	11.85	11.92	17.78	21.5	9.61	10.86	11.45	11.3	4.502	5.196	4.379	4.697	4.273	5.184	4.831	5.436	5.232	5.756	4.673	5.356	5.342	6.293	5.622	6.202
540	11.3	15.17	15.13	13.46	20.31	21.52	12.35	13.59	13.45	12.83	19.82	23.8	10.28	11.85	12.63	12.07	4.932	5.743	4.964	5.281	4.733	5.665	5.441	5.852	5.635	6.792	5.143	5.908	5.782	6.694	6.261	6.865
570	12.17	16.69	16.35	14.46	22.11	23.38	13.38	14.41	14.73	13.43	21.12	25.47	10.91	12.75	13.59	12.89	5.56	6.106	5.303	5.975	5.115	6.249	5.763	6.413	6.071	7.843	5.586	6.507	6.293	7.272	7.157	7.66
600	12.82	17.49	17.55	15.22	23.78	24.64	14.12	15.54	15.57	14.01	22.35	26.57	11.14	13.49	14.14	13.18	5.83	6.471	5.795	6.441	5.389	6.773	6.257	6.803	6.474	8.902	6.18	7.106	6.768	7.684	8.149	8.364
630	13.47	18.45	18.42	15.76	24.67	25.54	14.78	16.2	16.41	14.73	23.13	27.24	11.3	13.9	14.63	13.83	6.226	6.936	6.242	7.075	5.791	7.241	6.701	7.327	6.723	9.978	6.652	7.62	7.156	8.161	8.976	9.339
660	14.1	19.05	19.23	16.25	25.27	25.86	15.06	16.69	17.09	15.03	23.87	27.58	11.45	14.32	15.02	13.98	6.45	7.04	6.464	7.599	6.175	7.465	6.956	7.628	6.956	10.92	7.188	8.095	7.395	8.459	9.879	10.11
690	14.83	19.73	20.18	16.94	25.71	26.31	15.6	17.56	17.66	15.48	23.94	27.8	11.66	14.7	15.3	14.44	6.733	7.336	6.67	8.037	6.284	7.691	7.199	7.899	7.09	11.66	7.448	8.389	7.738	8.613	10.49	10.49
720	15.31	20.5	20.97	17.67	26.2	26.83	16.04	18.34	18.51	15.82	24.41	28.21	12.01	15.29	15.99	14.97	6.794	7.377	6.893	8.35	6.319	7.828	7.327	7.993	7.332	12.29	7.703	8.684	7.951	8.68	11.22	11.01
750	16.17	21.11	21.73	18.51	26.62	27.55	16.85	19.12	19.24	16.55	25.12	28.61	12.3	15.73	16.41	15.38	6.897	7.383	7.031	8.582	6.429	7.98	7.377	8.23	7.267	12.79	7.862	8.828	8.065	8.627	11.66	11.48
780	16.98	22.04	22.49	19.46	27.1	28.03	17.11	19.75	19.95	17.07	25.65	29.1	12.76	16.25	16.92	16.03	7.01	7.452	7.054	8.932	6.485	8.204	7.457	8.485	7.344	13.25	7.934	9.065	8.051	8.832	12.18	11.73
810	17.76	22.65	23.49	20	28.11	28.72	17.7	20.27	20.84	17.46	26.04	29.45	13.21	16.84	17.3	16.58	7.087	7.565	7.25	9.24	6.603	8.258	7.664	8.777	7.441	13.47	8.133	9.315	8.288	9.019	12.49	12.08
840	18.3	23.05	24.11	20.48	28.53	29.65	18.07	20.96	21.35	17.93	26.69	29.92	13.61	17.42	17.95	17.48	7.272	7.693	7.211	9.528	6.68	8.5	7.75	9.049	7.628	13.83	8.4	9.665	8.311	8.988	13.04	12.52
870	18.82	23.7	24.85	21.21	28.99	30.04	18.61	21.37	21.91	18.47	26.87	30.25	13.85	17.7	18.32	17.64	7.543	7.821	7.485	9.88	6.762	8.641	7.887	9.298	7.622	14.04	8.504	10.01	8.501	9.188	13.64	13.13
900	19.26	24.16	25.21	21.44	29.15	30.31	18.49	21.49	22.06	18.83	27.31	30.5	14.15	18.03	18.54	18.21	7.781	8.022	7.79	10.38	6.932	8.797	8.102	9.482	7.739	14.4	8.695	10.41	8.639	9.527	14.24	13.73
930	19.64	24.2	25.64	21.85	29.56	30.67	18.88	21.62	22.68	18.82	27.47	30.43	14.3	18.44	18.68	18.75	8.015	8.142	7.91	10.71	7.208	9.025	8.245	9.993	8.056	14.87	9.039	10.89	8.823	9.633	14.91	14.31
n=16
OD600
Time (min)	BY4741 pGAL1::YFP																BY4741 pGAL1::YFP +SICLOPPS:G4CP2
0	0.2525	0.3059	0.1865	0.1721	0.2591	0.2578	0.2342	0.2079	0.2556	0.4394	0.2519	0.3044	0.2828	0.2385	0.1915	0.26	0.2978	0.2778	0.2199	0.2204	0.2663	0.2556	0.2285	0.3229	0.3069	0.2156	0.2718	0.3004	0.2409	0.3679	0.1915	0.2832
30	0.2684	0.3517	0.2131	0.2164	0.3001	0.2934	0.2667	0.2388	0.2886	0.4798	0.2861	0.3367	0.3093	0.2581	0.2015	0.2829	0.3136	0.2875	0.2349	0.2249	0.2768	0.266	0.2362	0.3382	0.3213	0.2208	0.2874	0.3048	0.2525	0.3857	0.2137	0.3158
60	0.287	0.3717	0.2429	0.2492	0.3107	0.3138	0.2882	0.2687	0.2914	0.4904	0.307	0.3609	0.3287	0.2776	0.2203	0.3046	0.3283	0.3047	0.25	0.2385	0.2905	0.2804	0.2517	0.3558	0.3388	0.2291	0.2971	0.3198	0.267	0.4054	0.2324	0.3333
90	0.2997	0.3899	0.2707	0.2718	0.3147	0.3283	0.3063	0.2859	0.2947	0.5004	0.3219	0.3748	0.3452	0.2902	0.2375	0.322	0.3443	0.3202	0.2633	0.2532	0.3017	0.2958	0.2671	0.3756	0.3534	0.2379	0.3109	0.3345	0.2829	0.4235	0.2422	0.353
120	0.3157	0.4113	0.3057	0.2966	0.3234	0.3463	0.3281	0.3095	0.3044	0.5117	0.3427	0.3976	0.3615	0.3083	0.2555	0.3412	0.365	0.3408	0.278	0.2696	0.3164	0.3147	0.2832	0.3997	0.3703	0.2436	0.3256	0.3515	0.3059	0.4473	0.2593	0.3707
150	0.338	0.4372	0.339	0.3212	0.3356	0.3661	0.3521	0.3317	0.3165	0.5293	0.3661	0.4179	0.3821	0.3299	0.2761	0.367	0.387	0.3663	0.2975	0.2902	0.3329	0.3372	0.3039	0.4267	0.3931	0.254	0.3411	0.3763	0.3243	0.4766	0.2766	0.3832
180	0.3672	0.4632	0.3747	0.3512	0.3533	0.3907	0.3786	0.3584	0.3351	0.5486	0.3889	0.4408	0.4003	0.3602	0.2999	0.3888	0.4102	0.3942	0.3189	0.314	0.3535	0.3661	0.3297	0.4601	0.4163	0.2695	0.3628	0.4068	0.3511	0.5083	0.2969	0.4025
210	0.3944	0.492	0.4043	0.3807	0.3729	0.4132	0.4065	0.3844	0.3524	0.567	0.4043	0.4633	0.42	0.3851	0.3227	0.4114	0.4358	0.4279	0.3435	0.3398	0.378	0.3975	0.359	0.4972	0.4443	0.2883	0.3841	0.4364	0.3822	0.5441	0.3175	0.4259
240	0.4156	0.5183	0.4296	0.4085	0.3913	0.4293	0.4294	0.4108	0.3703	0.5819	0.4231	0.4831	0.4415	0.4082	0.3451	0.4351	0.4651	0.463	0.371	0.369	0.4045	0.4308	0.3901	0.5373	0.4753	0.3115	0.4077	0.4739	0.4171	0.5835	0.339	0.4562
270	0.4343	0.5365	0.4459	0.4275	0.4063	0.4412	0.4495	0.4382	0.3852	0.5966	0.4355	0.5038	0.4558	0.4289	0.3663	0.4509	0.4934	0.5002	0.3995	0.3981	0.4344	0.4683	0.4182	0.5793	0.51	0.3341	0.4337	0.5116	0.4519	0.6243	0.3662	0.493
300	0.4456	0.5532	0.4406	0.4439	0.4182	0.4533	0.4684	0.4643	0.4029	0.6086	0.4441	0.5234	0.4737	0.4516	0.3874	0.4658	0.5201	0.5347	0.426	0.4267	0.4623	0.5032	0.447	0.6101	0.5376	0.3614	0.4556	0.5472	0.4856	0.661	0.3954	0.5317
330	0.4584	0.5699	0.4472	0.4654	0.4296	0.4677	0.4887	0.4906	0.4213	0.6229	0.4544	0.5452	0.4894	0.4723	0.407	0.4821	0.5414	0.5599	0.4496	0.4524	0.4849	0.5309	0.4664	0.6378	0.5625	0.3875	0.4776	0.5792	0.5125	0.6883	0.4214	0.5616
360	0.4732	0.5873	0.4504	0.488	0.4448	0.4832	0.5071	0.5181	0.4373	0.6341	0.4681	0.568	0.5046	0.4934	0.4277	0.4993	0.5578	0.5782	0.466	0.4722	0.5006	0.5512	0.486	0.6582	0.5792	0.4085	0.4962	0.598	0.5319	0.7078	0.4465	0.5956
390	0.4896	0.6088	0.4736	0.5134	0.4595	0.4998	0.5244	0.5479	0.4551	0.6491	0.4854	0.5888	0.5209	0.5148	0.4509	0.5153	0.5703	0.5939	0.4801	0.4871	0.512	0.569	0.4974	0.6747	0.5945	0.4255	0.5098	0.6146	0.5472	0.7255	0.461	0.6185
420	0.5082	0.6306	0.4999	0.5411	0.4786	0.5171	0.5426	0.5767	0.4729	0.6668	0.508	0.6165	0.5395	0.5359	0.4719	0.535	0.5812	0.6079	0.4932	0.4991	0.5231	0.5839	0.5081	0.6904	0.6047	0.4397	0.525	0.6314	0.5628	0.7422	0.4773	0.6388
450	0.5307	0.6528	0.5159	0.568	0.4981	0.536	0.5638	0.6025	0.4925	0.6827	0.5284	0.6394	0.5611	0.5553	0.4937	0.5573	0.5939	0.623	0.5061	0.5143	0.536	0.6016	0.5217	0.706	0.6189	0.455	0.5415	0.6484	0.5792	0.7588	0.498	0.6595
480	0.5518	0.6767	0.5525	0.5938	0.5175	0.5552	0.582	0.6254	0.5152	0.7001	0.553	0.6672	0.5818	0.5753	0.5172	0.5803	0.6083	0.6381	0.5171	0.529	0.5486	0.6161	0.5341	0.7211	0.6329	0.4701	0.5559	0.665	0.5958	0.7737	0.5171	0.6786
510	0.5735	0.7035	0.5886	0.6213	0.5372	0.5744	0.6011	0.6474	0.5365	0.7161	0.5766	0.6916	0.6017	0.5932	0.5395	0.6018	0.625	0.6519	0.5308	0.5453	0.5609	0.6308	0.5479	0.7374	0.6474	0.4855	0.5721	0.6812	0.6104	0.7868	0.5374	0.6961
540	0.5934	0.7311	0.6236	0.6486	0.5568	0.5961	0.6227	0.6677	0.5586	0.7363	0.5998	0.7148	0.6199	0.613	0.5624	0.6212	0.6361	0.668	0.5447	0.5653	0.5749	0.6465	0.5623	0.7522	0.6618	0.5014	0.5918	0.6978	0.6271	0.8011	0.5533	0.715
570	0.6127	0.7545	0.6537	0.6696	0.5799	0.6172	0.6453	0.6868	0.581	0.7501	0.6191	0.7344	0.6367	0.6289	0.5836	0.6388	0.6491	0.6829	0.5584	0.5834	0.5874	0.6631	0.5762	0.7682	0.6753	0.5189	0.6105	0.7162	0.6455	0.8177	0.5742	0.7333
600	0.6314	0.7749	0.6813	0.6874	0.6017	0.6372	0.6643	0.7065	0.6004	0.7649	0.6372	0.7487	0.6513	0.6453	0.6024	0.6566	0.6639	0.6992	0.5743	0.6029	0.6021	0.6807	0.5933	0.7841	0.6887	0.5365	0.6284	0.7332	0.6647	0.8328	0.5972	0.7543
630	0.6449	0.7908	0.7057	0.7028	0.6162	0.6505	0.6766	0.7196	0.6191	0.7781	0.6557	0.7615	0.6624	0.6573	0.6167	0.6717	0.6787	0.7161	0.5924	0.6219	0.6159	0.699	0.6088	0.7991	0.707	0.5581	0.6486	0.7513	0.6826	0.8476	0.6185	0.7739
660	0.6592	0.8111	0.7221	0.7171	0.6311	0.6635	0.69	0.7313	0.633	0.7871	0.6672	0.7694	0.671	0.6684	0.6322	0.6857	0.6916	0.7317	0.6081	0.6403	0.6297	0.7158	0.627	0.815	0.7189	0.5778	0.6669	0.7666	0.7004	0.8608	0.6395	0.7914
690	0.6666	0.8158	0.7244	0.7268	0.6415	0.6741	0.7007	0.7402	0.6478	0.7982	0.6798	0.7782	0.6794	0.677	0.644	0.696	0.7042	0.7438	0.6229	0.6571	0.642	0.7295	0.6422	0.8282	0.7326	0.5964	0.6869	0.7811	0.7163	0.8733	0.6578	0.8085
720	0.6721	0.824	0.7243	0.7343	0.6493	0.68	0.7051	0.7429	0.6554	0.8027	0.6855	0.7835	0.6862	0.6842	0.653	0.706	0.7167	0.755	0.637	0.6715	0.6519	0.7413	0.654	0.8387	0.7406	0.6131	0.7012	0.7929	0.7292	0.8824	0.6753	0.824
750	0.6799	0.8303	0.7273	0.7415	0.6538	0.6858	0.7113	0.7449	0.6605	0.8085	0.6924	0.7879	0.6918	0.692	0.6645	0.7163	0.7241	0.7641	0.6484	0.6842	0.6613	0.7522	0.665	0.8472	0.751	0.6274	0.7124	0.8015	0.7422	0.8899	0.6868	0.8355
780	0.684	0.8367	0.7264	0.7473	0.6593	0.6916	0.7153	0.7501	0.6656	0.8125	0.6952	0.7893	0.6973	0.6952	0.6726	0.7239	0.7297	0.7701	0.6573	0.694	0.6656	0.7579	0.6744	0.8512	0.7582	0.6389	0.7214	0.8091	0.7493	0.8961	0.7	0.8442
810	0.6883	0.8406	0.7423	0.7508	0.6647	0.696	0.7195	0.7515	0.6703	0.8142	0.6993	0.7898	0.7009	0.7005	0.6836	0.7325	0.7317	0.7764	0.6651	0.7033	0.6698	0.763	0.6813	0.8559	0.7637	0.6465	0.7294	0.8156	0.7563	0.9008	0.7052	0.8509
840	0.6918	0.8442	0.746	0.7542	0.6705	0.7043	0.7229	0.7576	0.6747	0.8194	0.7025	0.7917	0.7047	0.7032	0.6899	0.7409	0.7358	0.7813	0.6699	0.7101	0.6735	0.7683	0.6868	0.8603	0.7665	0.6521	0.7342	0.8193	0.7602	0.904	0.7136	0.8559
870	0.6953	0.8454	0.7427	0.7561	0.6685	0.7028	0.7226	0.7532	0.6774	0.8204	0.7043	0.7928	0.7073	0.7053	0.6955	0.7468	0.7393	0.7851	0.6753	0.7143	0.6763	0.7723	0.6924	0.8641	0.771	0.6591	0.7394	0.8241	0.7648	0.9065	0.7209	0.8606
900	0.6985	0.8499	0.7443	0.7588	0.6685	0.7047	0.7225	0.7519	0.6799	0.8227	0.707	0.7929	0.7095	0.7089	0.7001	0.7543	0.7403	0.7897	0.6802	0.7185	0.6777	0.7734	0.696	0.8643	0.7709	0.6619	0.7414	0.8269	0.7682	0.9083	0.7266	0.8642
930	0.7025	0.8531	0.7434	0.762	0.6734	0.7101	0.7277	0.7579	0.683	0.8244	0.7074	0.7926	0.711	0.7081	0.7015	0.7587	0.7401	0.791	0.6824	0.7217	0.6793	0.7742	0.6987	0.8656	0.7758	0.6653	0.7455	0.8305	0.7723	0.9114	0.7302	0.8683

## Sheet: SICLOPPS statistics
Supplementary Dataset 5
YFP/OD statistics for the SICLOPPS experiment (Fig. 4 A,B,C)
	Gal/Glu=1:1		Gal 0.1%+Glu 0.1%							Gal/Glu=10:1		Gal 0.1%+Glu 0.01%
Sidak's multiple comparisons test	Predicted (LS) mean diff,	95,00% CI of diff,	Significant?	Summary	Adjusted P Value				Sidak's multiple comparisons test	Mean Diff,	95,00% CI of diff,	Significant?	Summary	Adjusted P Value
Ctrl - G4CP2-Siclops (Time)									Ctrl - G4CP2-Siclops (Time)
0	0.0273	-1,918 to 1,972	No	ns	>0,9999				0	0.01761	-4,326 to 4,361	No	ns	>0,9999
30	-0.06893	-2,014 to 1,876	No	ns	>0,9999				30	-0.1449	-4,488 to 4,199	No	ns	>0,9999
60	-0.1701	-2,115 to 1,775	No	ns	>0,9999				60	-0.2061	-4,550 to 4,137	No	ns	>0,9999
90	-0.153	-2,098 to 1,792	No	ns	>0,9999				90	-0.1941	-4,538 to 4,149	No	ns	>0,9999
120	-0.1905	-2,136 to 1,755	No	ns	>0,9999				120	-0.1534	-4,497 to 4,190	No	ns	>0,9999
150	-0.188	-2,133 to 1,757	No	ns	>0,9999				150	-0.04302	-4,387 to 4,300	No	ns	>0,9999
180	-0.1368	-2,082 to 1,808	No	ns	>0,9999				180	0.2792	-4,064 to 4,623	No	ns	>0,9999
210	-0.06901	-2,014 to 1,876	No	ns	>0,9999				210	1.028	-3,315 to 5,372	No	ns	>0,9999
240	0.2017	-1,744 to 2,147	No	ns	>0,9999				240	2.289	-2,055 to 6,632	No	ns	0.9601
270	0.7282	-1,217 to 2,673	No	ns	0.9998				270	4.01	-0,3333 to 8,354	No	ns	0.1079
300	1.642	-0,3036 to 3,587	No	ns	0.2191				300	5.978	1,634 to 10,32	Yes	***	0.0005
330	2.799	0,8542 to 4,745	Yes	***	0.0002				330	7.845	3,502 to 12,19	Yes	****	<0,0001
360	3.908	1,963 to 5,853	Yes	****	<0,0001				360	9.348	5,004 to 13,69	Yes	****	<0,0001
390	4.667	2,722 to 6,613	Yes	****	<0,0001				390	10.31	5,971 to 14,66	Yes	****	<0,0001
420	5.103	3,158 to 7,048	Yes	****	<0,0001				420	11.21	6,863 to 15,55	Yes	****	<0,0001
450	5.287	3,342 to 7,232	Yes	****	<0,0001				450	12.08	7,732 to 16,42	Yes	****	<0,0001
480	5.382	3,436 to 7,327	Yes	****	<0,0001				480	13.06	8,717 to 17,40	Yes	****	<0,0001
510	5.664	3,719 to 7,610	Yes	****	<0,0001				510	14.03	9,682 to 18,37	Yes	****	<0,0001
540	5.96	4,015 to 7,905	Yes	****	<0,0001				540	14.77	10,42 to 19,11	Yes	****	<0,0001
570	6.298	4,352 to 8,243	Yes	****	<0,0001				570	15.1	10,76 to 19,44	Yes	****	<0,0001
600	6.424	4,479 to 8,369	Yes	****	<0,0001				600	15.12	10,78 to 19,47	Yes	****	<0,0001
630	6.386	4,441 to 8,332	Yes	****	<0,0001				630	15.01	10,67 to 19,36	Yes	****	<0,0001
660	6.177	4,232 to 8,123	Yes	****	<0,0001				660	14.85	10,50 to 19,19	Yes	****	<0,0001
690	6.003	4,058 to 7,948	Yes	****	<0,0001				690	14.99	10,65 to 19,33	Yes	****	<0,0001
720	5.885	3,939 to 7,830	Yes	****	<0,0001				720	15.43	11,09 to 19,78	Yes	****	<0,0001
750	5.921	3,976 to 7,866	Yes	****	<0,0001				750	16	11,66 to 20,35	Yes	****	<0,0001
780	6.125	4,179 to 8,070	Yes	****	<0,0001				780	16.55	12,20 to 20,89	Yes	****	<0,0001
810	6.425	4,480 to 8,371	Yes	****	<0,0001				810	17.02	12,68 to 21,37	Yes	****	<0,0001
840	6.721	4,776 to 8,667	Yes	****	<0,0001				840	17.42	13,07 to 21,76	Yes	****	<0,0001
870	6.895	4,949 to 8,840	Yes	****	<0,0001				870	17.75	13,40 to 22,09	Yes	****	<0,0001
900	7.226	5,281 to 9,171	Yes	****	<0,0001				900	17.7	13,36 to 22,05	Yes	****	<0,0001
930	7.2	5,255 to 9,145	Yes	****	<0,0001				930	17.61	13,27 to 21,95	Yes	****	<0,0001

## Sheet: FEEDING Gal 0.1 Glu 0.1
Supplementary Dataset 5
Raw data for the fluorescence measurment over time of BY4741 pGAL1::YFP treated or not with chemically synthesized G4CP2 and the random CP11 peptide
Gal/Glu=1:1		Gal 0.1%+Glu 0.1%
G4CP2 100uM
CP11 100uM
n=12	YFP/OD
	CTRL												G4CP2												CP11
Time (min)
0	2.34413	2.36003	2.3285	2.01962	2.45545	2.27541	2.49411	2.24153	2.23819	2.3256	1.96987	2.22606	2.0813	1.90238	1.79398	1.91105	2.03106	1.96327	1.72989	1.78415	1.88132	1.93333	2.3202	1.75858	2.21953	2.25484	2.15592	2.13713	2.40169	1.9971	2.31987	2.2199	2.53777	2.34756	2.07191	2.17807
30	2.2454	1.96538	1.90589	1.88029	2.11742	2.14469	2.10151	1.96093	2.10119	2.21514	1.81077	2.19363	1.22188	1.83316	1.34961	1.24689	1.97707	1.76852	1.61546	1.87558	1.64588	1.91505	1.59558	2.09075	2.03529	1.9517	1.8815	1.87058	2.22855	1.73395	1.8817	1.80499	2.10383	2.19745	1.9103	2.2011
60	2.2836	1.959	1.98126	1.81512	2.19657	2.02627	2.1371	1.95259	2.1353	2.17713	1.78491	2.14112	1.15331	1.76002	1.27288	1.37706	1.71129	1.44359	1.7667	1.94906	2.17884	1.73758	1.67356	1.55732	2.07471	2.12158	1.78179	1.91099	2.1207	1.62309	1.94994	1.98091	2.03107	1.98324	1.95534	2.0829
90	2.1263	1.81558	2.02497	1.73045	2.15203	2.02147	1.96655	1.89842	2.06694	1.96467	1.77266	1.97175	1.32372	1.70926	0.983821	1.30167	1.38006	1.256	1.7798	1.87816	1.87754	1.44454	1.65545	1.16118	2.36787	1.97753	1.92181	1.96476	2.27099	1.78615	2.00709	1.99944	2.11181	2.19307	1.94072	1.96054
120	2.3173	1.77873	1.94204	1.70425	2.02018	1.87629	2.01997	1.92143	2.00758	1.8099	1.75574	2.03092	1.54714	1.76722	1.0284	1.39041	1.54609	1.2218	1.80385	1.96089	1.7525	1.48496	1.59459	1.26957	2.36936	2.06949	1.98101	1.99563	2.25723	1.97312	1.92496	2.03311	2.03798	2.16462	1.82466	1.988
150	2.10206	1.90812	1.87362	1.62946	2.08721	1.99891	2.07684	2.15868	2.06519	1.95735	1.70572	2.13859	1.44974	1.86976	1.15369	1.55698	1.44888	1.38426	1.71383	1.85775	1.82095	1.43112	1.61466	1.37266	2.45859	2.1488	2.06447	2.2101	2.31789	1.99061	1.91376	2.03885	2.22566	2.22446	1.89868	2.04757
180	2.08485	1.98073	1.9212	1.84296	2.1604	2.23183	2.19482	2.19676	2.28803	2.03041	1.92332	2.35946	1.50895	1.937	1.31756	1.84307	1.69029	1.56681	1.77985	2.12311	1.91786	1.79567	1.98611	1.57691	2.58893	2.3978	2.21599	2.4363	2.34012	2.20228	2.31377	2.18927	2.39388	2.35881	2.24953	2.332
210	2.32391	2.5033	2.5132	2.28484	2.46007	2.36347	2.48958	2.53611	2.48235	2.61506	2.08789	2.77974	1.96214	2.35573	1.84003	2.39447	2.33608	2.33221	2.10508	2.40976	2.60953	2.27203	2.46129	1.79231	3.05574	2.9334	2.90982	3.09784	2.88982	2.79641	2.88838	2.7415	2.94297	2.95359	2.81195	2.90184
240	2.93144	3.50021	3.29598	3.27005	3.23364	3.0613	3.37973	3.48002	3.18169	3.20025	2.91388	4.06177	3.01425	3.24093	2.65148	3.59235	3.95136	3.35938	2.90025	2.63752	3.58062	3.21712	3.32619	2.52909	4.38774	4.17566	4.0328	4.15126	3.85412	4.1827	4.19706	3.74462	3.99259	4.08777	3.85121	4.12913
270	4.21004	5.14308	4.83696	4.8163	4.59648	4.48971	4.88651	5.20181	4.46021	4.86832	4.43791	6.12469	4.94002	4.67241	4.5344	5.86656	6.41565	5.58759	4.66596	3.93188	4.99211	4.87871	5.75779	4.18615	5.99516	6.64642	6.37243	6.23104	5.87466	6.61058	6.36292	5.76181	6.10361	6.23028	5.73308	6.26786
300	6.1812	8	6.99742	7.34102	7.222	7.13212	7.2705	8.07707	6.87636	7.44284	6.93041	9.52474	7.64958	7.96535	7.09272	7.8868	9.14766	9.22222	7.31984	5.86217	8.13255	8.51237	9.05841	6.91361	9.56646	10.1227	9.47788	9.7615	8.95408	9.83155	10.1529	8.94141	9.63054	9.77947	9.27333	9.65571
330	9.24309	11.8745	10.7396	10.8394	11.1861	11.482	11.171	12.1715	10.3724	10.9862	10.5408	14.1474	11.9978	11.7454	10.5984	10.3528	13.6793	13.5435	10.9587	9.13951	12.2993	12.6108	12.9913	10.2445	14.0454	15.3255	13.9139	14.2927	13.5746	14.4538	14.6959	13.1543	14.6328	14.4682	13.8003	14.3042
360	13.4126	15.8715	15.3862	15.5339	16.0007	16.8761	16.273	16.6297	14.9462	16.0653	15.1254	20.0179	15.3315	16.5212	14.3367	14.538	18.3447	18.3927	15.4418	13.2388	16.7195	17.5729	18.5177	15.66	20.6725	21.5055	19.506	19.8779	20.5344	19.9965	20.0678	19.2766	20.8393	20.3153	19.2585	19.6403
390	18.7663	21.894	20.7325	20.5861	22.1164	23.011	22.0079	22.8858	20.8569	21.9301	20.0346	26.3046	19.0278	20.8791	18.764	17.3191	23.1697	21.142	20.243	17.5043	22.1202	22.2121	22.2971	19.8119	26.9633	27.9596	24.5726	26.0345	27.038	25.5713	26.6173	25.1607	27.3885	26.6323	25.0032	26.4566
420	25.4699	27.9731	26.7499	26.3642	29.5484	30.2119	28.6079	29.0159	27.3258	27.6185	25.8371	32.023	22.494	22.6377	21.9898	22.6525	27.9089	25.1049	24.4824	22.0905	28.8901	26.2164	26.8666	23.3564	35.3679	35.0169	31.0686	32.277	33.9365	31.9942	32.529	32.3433	34.6363	34.226	30.6122	33.1826
450	32.2285	33.4458	33.118	32.1569	36.782	36.6893	35.4924	35.8909	34.2198	33.7376	31.6638	38.6662	29.1913	29.7301	24.9619	24.5093	33.4167	29.462	28.935	26.6943	31.5723	30.3748	32.0247	28.6872	43.4831	40.9852	38.1501	39.4737	40.5736	38.5318	38.7478	38.833	41.888	40.6945	37.0349	40.4425
480	39.3892	39.8067	39.9723	38.4368	44.8201	44.5545	42.4666	42.6199	40.7925	39.0017	37.9801	45.6328	33.5878	34.5346	28.8566	28.4601	37.5135	35.2834	33.68	30.3436	37.822	34.9179	35.1007	31.8698	51.8951	47.7211	44.4966	46.347	49.5493	44.6563	44.4988	47.4359	49.4753	47.7671	43.409	48.1805
510	46.4286	46.5149	46.4117	43.5644	52.7463	51.5664	49.4793	48.9343	46.6948	44.7505	44.1969	51.5825	36.0212	39.2816	30.6486	31.3872	41.0112	39.1198	37.8109	34.3125	42.5684	42.6957	40.0494	36.3139	60.0597	53.7834	50.8637	53.6682	55.5211	50.4881	50.3672	55.5361	55.884	53.9973	49.2911	53.6499
540	54.1279	52.4189	53.1549	49.9759	60.8648	57.2881	56.7143	55.2558	53.3786	51.8417	49.8005	57.128	38.0232	44.4737	33.9726	37.278	48.0224	44.2763	40.5214	37.8685	45.9705	47.6252	44.0858	39.7111	68.4789	59.1826	56.4852	60.496	60.7803	56.9672	55.9487	62.6458	63.144	60.3253	54.7755	59.5592
570	61.6301	56.9106	58.2276	54.7923	67.0899	63.0296	61.7313	61.0434	58.7968	57.9774	55.8145	61.4611	43.2509	46.6989	38.911	39.1621	55.7594	46.0181	44.6061	41.4201	48.7939	49.6038	49.3358	42.7779	76.6706	64.4509	61.6655	66.7212	69.484	62.4729	60.7891	68.4766	67.9382	65.6545	59.3554	64.9499
600	68.2921	62.5752	63.9447	60.1476	73.2777	69.1347	66.9076	66.5994	64.2696	62.7003	59.3764	66.6281	45.319	49.0214	42.2588	41.3352	59.7159	48.9174	49.3548	45.2956	53.3951	51.5789	52.3661	45.1633	82.221	67.3391	65.5975	72.252	73.3212	66.3634	64.472	73.9729	72.7124	71.1351	64.3639	70.0939
630	73.116	66.0816	67.9574	63.9513	77.7803	72.7292	70.5938	70.2163	68.0634	68.2982	62.5927	68.3436	46.6939	49.1013	43.261	40.0965	60.98	53.1954	51.5226	46.2782	53.5013	57.2499	54.8063	50.6667	88.0722	70.6709	68.2605	74.8789	78.4886	69.667	67.4699	76.5514	76.7686	75.235	67.2138	72.7541
660	77.3886	68.3456	70.7108	66.2013	80.4615	75.1135	72.9494	73.1395	70.0991	71.1399	65.4557	70.5292	48.755	52.4604	44.4527	43.7614	65.6517	51.1932	53.3776	46.7853	55.8789	57.8544	55.6893	52.8038	90.1154	72.0186	71.0573	78.1689	81.0597	72.1675	68.4292	78.127	79.5436	76.991	69.3223	74.7688
690	80.5451	70.5206	72.8356	67.8185	83.3032	76.6416	75.0751	74.5826	71.9536	75.6719	65.9751	71.6737	51.9247	51.2109	50.1625	43.9678	63.3161	49.8335	55.2865	48.0658	56.1054	58.0226	58.1525	49.0683	91.3152	71.6715	72.2535	79.0595	83.346	73.188	70.4326	79.9434	80.3503	78.638	70.5533	75.4721
720	81.778	71.1401	74.7313	69.4203	86.7458	76.7181	75.4878	75.2969	72.8263	81.0435	67.7937	72.8134	52.555	51.3528	50.379	44.7752	66.4104	50.7061	55.0226	46.9209	60.1106	59.4446	60.0217	49.3613	94.6114	72.2118	72.9784	80.1639	84.9003	74.4058	70.2882	80.0758	82.1492	80.0334	71.1452	76.4505
750	84.1223	73.1442	76.9492	70.4384	88.8213	77.6602	77.241	77.4428	74.3837	86.392	69.076	74.4559	55.7555	52.4142	52.9521	45.7983	64.9949	52.1287	56.7158	47.6767	58.0355	57.7494	56.3832	45.9817	94.5306	73.2345	74.1324	80.2365	87.7264	76.4079	71.7126	79.7702	83.7027	82.3249	72.3754	77.6431
780	87.1154	74.4575	79.5511	72.3466	92.1772	79.4422	78.425	79.1815	75.6795	85.2947	71.2695	76.0478	55.9684	52.2527	52.8757	45.5641	69.2566	54.4695	59.5326	48.6329	57.537	59.8387	58.8992	52.4055	97.5405	73.3565	74.6373	81.5123	89.7244	76.3541	71.9904	81.4252	85.676	83.992	73.7925	79.037
810	89.8471	78.1405	82.5704	74.4144	95.155	82.3755	79.7346	80.5613	77.7532	88.4109	73.2343	77.6937	58.2586	57.8787	54.6554	48.0551	74.3213	55.1809	60.5683	50.19	59.27	63.1766	58.7654	50.6088	99.3859	74.4258	76.5533	82.5589	93.2297	77.4176	73.2322	83.5349	86.2408	87.0822	75.5744	79.8791
840	93.8111	79.7391	84.2394	76.7876	99.0033	84.0139	81.9639	84.1362	80.1811	91.0119	75.2909	80.4495	61.1333	58.3977	57.7735	46.8056	74.3086	55.8526	63.0975	51.6149	61.3775	65.7545	61.1719	50.2655	104.189	75.6331	77.8028	85.1324	94.4357	79.3683	75.1781	85.407	87.7933	90.4762	76.5641	82.1808
870	95.0617	81.4252	86.7009	77.3018	101.567	85.7298	83.5207	84.827	81.8492	96.7579	76.2137	81.4572	62.0518	58.9344	56.5279	50.3847	73.9757	60.9961	63.7374	51.932	63.5256	64.5132	64.6692	51.4296	107.101	76.8328	79.7755	86.9513	97.6169	80.7819	77.0684	86.6444	89.903	91.8541	78.9437	82.9036
900	97.7811	82.4842	88.1248	78.8598	103.122	86.8014	84.2463	86.6916	83.2865	95.0199	77.2183	82.6956	63.8532	61.5563	57.1749	49.8318	78.5097	56.9933	65.1937	51.7104	66.9131	71.6844	66.4621	50.9905	108.783	77.5126	80.6212	88.3307	98.0254	82.2657	77.0814	86.8267	91.0295	94.051	79.0525	83.6347
930	98.1927	84.0743	88.8375	79.4785	104.896	88.0597	85.6056	88.4687	84.4754	98.8605	78.3948	83.5362	63.0533	62.3214	57.1752	49.5716	79.6675	59.4327	66.4275	54.1776	70.313	70.6417	67.957	50.5034	109.192	78.5612	80.9837	88.9199	99.0293	81.9465	78.3419	88.374	92.058	96.2053	80.5316	85.2021
n=12	YFP
	CTRL												G4CP2												CP11
Time (min)
0	0.3113	0.3625	0.353	0.3294	0.3445	0.3313	0.3599	0.3508	0.3317	0.3407	0.34	0.3348	0.3584	0.3352	0.3396	0.3459	0.3662	0.3367	0.342	0.3265	0.3535	0.3364	0.371	0.338	0.3569	0.3495	0.3443	0.3413	0.342	0.3449	0.3561	0.3392	0.3662	0.3465	0.34	0.3278
30	0.3175	0.3406	0.3139	0.3377	0.3246	0.3335	0.3333	0.3463	0.3343	0.3686	0.3397	0.3444	0.3552	0.3615	0.3428	0.3303	0.3535	0.3629	0.3491	0.3241	0.3458	0.3359	0.3614	0.3663	0.3403	0.3273	0.3366	0.3382	0.3481	0.335	0.3229	0.3036	0.3404	0.3617	0.345	0.3601
60	0.3398	0.3679	0.3489	0.3505	0.3587	0.3317	0.3554	0.3542	0.3551	0.3675	0.3477	0.352	0.3498	0.3645	0.3685	0.359	0.3669	0.357	0.365	0.3329	0.3521	0.3708	0.364	0.3627	0.3388	0.3647	0.3307	0.3478	0.3391	0.3191	0.3506	0.3528	0.3465	0.3431	0.3678	0.3618
90	0.3283	0.3495	0.3649	0.3518	0.3652	0.339	0.3351	0.3495	0.3489	0.367	0.3501	0.335	0.3533	0.3451	0.3466	0.3659	0.3849	0.3454	0.3613	0.3345	0.3695	0.3438	0.3738	0.3494	0.3817	0.3433	0.3613	0.3568	0.3679	0.3508	0.3679	0.3577	0.3702	0.3862	0.3732	0.3478
120	0.371	0.3529	0.3686	0.3613	0.3604	0.3261	0.3541	0.3595	0.3443	0.3618	0.3594	0.3613	0.384	0.3591	0.3802	0.3857	0.4176	0.3542	0.3651	0.351	0.3682	0.38	0.3717	0.3843	0.3836	0.3663	0.3756	0.3652	0.3747	0.3891	0.3617	0.3684	0.3595	0.3879	0.3611	0.3644
150	0.3563	0.3925	0.3721	0.3606	0.3949	0.366	0.3784	0.419	0.3643	0.3993	0.3669	0.4012	0.3923	0.4106	0.4076	0.414	0.428	0.415	0.3767	0.3474	0.3824	0.3844	0.414	0.4247	0.4037	0.3928	0.4003	0.4113	0.3952	0.4029	0.3728	0.3831	0.4024	0.4093	0.3879	0.3874
180	0.3784	0.4316	0.4096	0.4307	0.431	0.4361	0.4236	0.4477	0.4226	0.4207	0.4314	0.4726	0.4468	0.4366	0.5236	0.505	0.5081	0.4796	0.4293	0.407	0.4273	0.4728	0.4717	0.4849	0.4396	0.4575	0.4463	0.4685	0.4252	0.4638	0.4771	0.4245	0.4534	0.4536	0.4805	0.465
210	0.452	0.5685	0.571	0.5623	0.5299	0.5098	0.5136	0.5478	0.4853	0.5557	0.5084	0.5982	0.6893	0.5364	0.6683	0.6932	0.7097	0.695	0.5589	0.494	0.5694	0.6782	0.6168	0.6947	0.5427	0.599	0.6195	0.6301	0.5508	0.6236	0.6366	0.5642	0.5986	0.6046	0.64	0.6149
240	0.62	0.8488	0.8029	0.8561	0.746	0.7191	0.7503	0.8011	0.6567	0.7607	0.741	0.9403	1.058	0.8219	1.164	1.202	1.121	1.075	0.8083	0.8506	0.8461	1.015	0.9932	0.9345	0.8306	0.9057	0.9098	0.8892	0.8005	0.9913	1.001	0.8358	0.8616	0.8989	0.937	0.9497
270	0.9561	1.312	1.246	1.324	1.122	1.113	1.141	1.263	0.9808	1.22	1.208	1.503	1.812	1.248	1.977	2.207	1.738	1.783	1.327	1.316	1.265	1.629	1.626	1.826	1.238	1.532	1.516	1.397	1.303	1.65	1.613	1.403	1.402	1.461	1.482	1.535
300	1.46	2.12	1.897	2.101	1.825	1.803	1.782	2.054	1.585	1.953	1.962	2.445	3.03	1.793	3.213	2.773	2.887	2.988	2.133	1.982	2.086	2.821	2.838	2.585	2.008	2.474	2.378	2.292	2.106	2.568	2.723	2.213	2.346	2.439	2.514	2.468
330	2.308	3.275	3.035	3.254	2.933	3.068	2.862	3.251	2.479	2.785	3.177	3.8	4.432	3.284	5.26	4.548	4.402	4.51	3.395	3.197	3.402	4.352	4.33	3.687	3.097	3.908	3.651	3.486	3.357	3.956	4.156	3.503	3.746	3.782	3.98	3.865
360	3.498	4.571	4.582	4.859	4.381	4.7	4.327	4.643	3.753	4.328	4.766	5.581	6.683	4.92	6.873	5.869	6.206	6.351	5.068	4.762	5.173	6.451	6.109	5.564	4.765	5.714	5.331	5.045	5.38	5.735	5.916	5.116	5.562	5.605	5.818	5.57
390	5.172	6.612	6.425	6.674	6.27	6.664	6.105	6.614	5.452	6.397	6.367	7.652	8.494	6.508	9.412	7.229	7.88	7.609	6.832	6.158	6.771	8.083	7.94	7.687	6.544	7.893	7.072	6.946	7.549	7.587	8.27	7.123	7.677	7.758	7.936	7.81
420	7.371	8.75	8.675	8.919	8.702	9.269	8.282	8.757	7.49	8.86	8.565	9.751	10.39	6.986	11.25	8.839	9.676	9.452	8.537	8.253	8.069	9.957	9.766	9.102	8.941	10.33	9.42	8.973	9.94	9.979	10.65	9.441	10.19	10.48	10.2	10.27
450	9.733	10.9	11.28	11.48	11.27	11.88	10.74	11.32	9.934	10.85	11	12.35	11.84	8.372	13.1	10.49	12.03	11.39	10.46	9.981	10.04	11.67	11.91	12.04	11.61	12.73	12.25	11.55	12.59	12.65	13.43	11.58	13.09	13.36	13.04	13.16
480	12.64	13.59	14.43	14.36	14.45	15.3	13.36	13.86	12.56	13.44	14.14	15.36	13.2	9.794	14.89	13.51	13.85	13.57	12.63	11.57	11.6	14.03	13.77	12.92	14.65	15.81	15.16	14.4	16.49	15.46	16.38	14.8	16.5	16.9	16.07	16.55
510	15.73	16.75	17.72	17.16	18.15	18.6	16.63	16.76	15.47	16.41	17.06	18.58	16.35	10.28	15.64	13.87	16.06	16	14.44	13.55	13.06	16.25	16.22	15.92	18.12	19.12	18.55	17.63	19.71	18.62	19.89	19.06	19.85	20.33	19.47	19.77
540	19.21	19.72	21.65	20.78	22.38	21.97	20.23	19.87	18.88	19	19.97	21.92	18.35	11.83	18.6	15.53	22.34	18.14	16.01	15.67	14.66	18.55	18.71	17.87	21.79	22.59	22.21	20.98	23.99	22.24	23.56	23.63	23.9	24.48	22.94	23.24
570	23.29	22.4	25.23	24.01	26.42	25.59	23.39	23.05	21.99	22.53	23.71	25.07	19.77	14.5	19.58	17.2	24.01	19.82	18.4	17.5	15.98	21.91	21.54	19.28	26.16	26.47	26.14	24.46	28.28	25.97	27.27	27.24	27.25	28.54	26.52	27.24
600	27.31	26	29.6	27.71	30.74	29.88	26.85	26.4	25.65	26.61	26.85	28.81	21.88	16.53	21.29	18.08	26.06	22.14	21.42	19.69	17.3	24.01	23.57	21.99	30.43	29.71	29.86	28.33	32.32	29.18	30.65	31.69	31.07	32.9	30.56	31.36
630	30.95	28.99	33.17	31.01	34.83	33.55	29.96	29.21	28.75	30.14	29.55	31.11	22.88	17.21	23.11	19.94	27.38	22.89	23.18	20.89	18.26	25.98	25.6	23.56	34.63	33.18	33.12	30.91	36.56	32.43	33.6	34.54	35.16	36.82	33.58	34.5
660	34.91	31.48	36.31	33.67	38.01	36.4	32.55	31.94	31.11	33.45	31.89	33.72	24.28	18.23	24.04	21.57	29.97	24.67	24.1	21.83	18.82	27.18	26.38	24.2	37.47	35.57	36.36	33.98	39.93	35.16	35.2	37.54	37.99	39.25	36.11	37.19
690	38.42	33.73	39.12	35.72	41.41	38.75	34.97	33.95	33.48	38.01	33.39	35.5	25.36	18.82	23.15	21.83	30.55	25.44	25.57	22.49	19.16	30.34	27.07	24.49	40.06	37.09	38.54	35.98	43.74	37.26	37.28	39.58	39.91	41.34	38	38.77
720	40.66	34.88	41.02	37.48	44.57	39.74	36.37	34.87	34.76	41.94	35.49	36.88	27.46	18.98	24.59	22.11	31.1	26.21	26.73	23.01	19.56	31.25	27.7	24.73	42.49	38.33	40.16	37.18	44.7	39.13	38.04	40.15	41.74	43.09	39.45	40.32
750	43.18	36.36	43.03	38.72	46.72	41.09	37.57	36.22	36.21	44.25	37.08	37.63	28.82	19.54	25.56	22.89	31.75	27.06	28.08	24.01	19.97	30.74	27.78	25.69	42.69	39.51	41.87	38	47.46	40.84	39.32	40.26	43.81	44.9	40.95	41.64
780	45.3	37.4	44.66	40.08	48.9	43.01	38.64	37.73	37.31	43.56	38.4	38.83	30.43	19.02	25.65	23.06	32.98	28.03	29.04	24.19	20.23	31.9	27.93	26.47	45.21	40.17	42.7	39.24	49.16	40.88	39.17	41.25	44.8	46.12	42.32	42.68
810	47.61	39.5	46.9	41.62	51.26	45.15	39.66	38.75	38.62	45.62	39.92	40.02	33.12	18.99	25.77	23.72	33.4	29.13	29.63	25.1	20.46	33.73	28.56	27.85	46.93	41.15	44.11	40.33	52.19	41.79	40.08	42.82	45.63	48.2	43.75	43.59
840	49.87	40.34	47.57	43.17	53.64	46.09	40.9	40.52	39.85	48.3	40.77	41.52	33.66	20.41	26.83	24.03	35.2	29.25	30.23	24.93	21.12	34.6	29.65	28.4	49.99	41.81	44.97	41.8	53.97	42.97	41.16	44.07	46.39	49.97	44.3	44.92
870	50.82	41.25	48.96	43.49	55.11	47.22	41.61	40.7	40.72	51.63	40.66	42.26	32.36	21.57	27.71	25.54	35.93	29.76	30.39	25.67	21.37	35.25	30.11	27.52	51.13	42.55	46.19	43.18	55.3	44.01	42.01	44.05	47.28	50.63	45.74	45.34
900	52.44	41.77	49.72	44.54	56.15	47.68	42.14	41.69	41.51	52.47	40.64	43.01	34.8	21.28	28.05	25.18	36.35	29.95	31.13	26	21.72	35.62	30.32	27.8	52.39	43.19	46.72	44.13	55.6	44.95	41.94	43.04	48.1	52.33	45.89	45.79
930	52.7	42.55	49.9	44.81	56.99	48.38	42.76	42.58	41.79	57.26	39.95	43.23	36.47	21.37	27.77	24.3	37.38	31.22	31.48	26.91	21.79	35.78	30.37	27.59	52.27	43.79	46.76	44.62	56.11	44.71	42.43	43.86	48.22	53.24	46.66	46.58
n=12	OD
	CTRL												G4CP2												CP11
Time (min)
0	0.1328	0.1536	0.1516	0.1631	0.1403	0.1456	0.1443	0.1565	0.1482	0.1465	0.1726	0.1504	0.1722	0.1762	0.1893	0.181	0.1803	0.1715	0.1977	0.183	0.1879	0.174	0.1599	0.1922	0.1608	0.155	0.1597	0.1597	0.1424	0.1727	0.1535	0.1528	0.1443	0.1476	0.1641	0.1505
30	0.1414	0.1733	0.1647	0.1796	0.1533	0.1555	0.1586	0.1766	0.1591	0.1664	0.1876	0.157	0.2907	0.1972	0.254	0.2649	0.1788	0.2052	0.2161	0.1728	0.2101	0.1754	0.2265	0.1752	0.1672	0.1677	0.1789	0.1808	0.1562	0.1932	0.1716	0.1682	0.1618	0.1646	0.1806	0.1636
60	0.1488	0.1878	0.1761	0.1931	0.1633	0.1637	0.1663	0.1814	0.1663	0.1688	0.1948	0.1644	0.3033	0.2071	0.2895	0.2607	0.2144	0.2473	0.2066	0.1708	0.1616	0.2134	0.2175	0.2329	0.1633	0.1719	0.1856	0.182	0.1599	0.1966	0.1798	0.1781	0.1706	0.173	0.1881	0.1737
90	0.1544	0.1925	0.1802	0.2033	0.1697	0.1677	0.1704	0.1841	0.1688	0.1868	0.1975	0.1699	0.2669	0.2019	0.3523	0.2811	0.2789	0.275	0.203	0.1781	0.1968	0.238	0.2258	0.3009	0.1612	0.1736	0.188	0.1816	0.162	0.1964	0.1833	0.1789	0.1753	0.1761	0.1923	0.1774
120	0.1601	0.1984	0.1898	0.212	0.1784	0.1738	0.1753	0.1871	0.1715	0.1999	0.2047	0.1779	0.2482	0.2032	0.3697	0.2774	0.2701	0.2899	0.2024	0.179	0.2101	0.2559	0.2331	0.3027	0.1619	0.177	0.1896	0.183	0.166	0.1972	0.1879	0.1812	0.1764	0.1792	0.1979	0.1833
150	0.1695	0.2057	0.1986	0.2213	0.1892	0.1831	0.1822	0.1941	0.1764	0.204	0.2151	0.1876	0.2706	0.2196	0.3533	0.2659	0.2954	0.2998	0.2198	0.187	0.21	0.2686	0.2564	0.3094	0.1642	0.1828	0.1939	0.1861	0.1705	0.2024	0.1948	0.1879	0.1808	0.184	0.2043	0.1892
180	0.1815	0.2179	0.2132	0.2337	0.1995	0.1954	0.193	0.2038	0.1847	0.2072	0.2243	0.2003	0.2961	0.2254	0.3974	0.274	0.3006	0.3061	0.2412	0.1917	0.2228	0.2633	0.2375	0.3075	0.1698	0.1908	0.2014	0.1923	0.1817	0.2106	0.2062	0.1939	0.1894	0.1923	0.2136	0.1994
210	0.1945	0.2271	0.2272	0.2461	0.2154	0.2157	0.2063	0.216	0.1955	0.2125	0.2435	0.2152	0.3513	0.2277	0.3632	0.2895	0.3038	0.298	0.2655	0.205	0.2182	0.2985	0.2506	0.3876	0.1776	0.2042	0.2129	0.2034	0.1906	0.223	0.2204	0.2058	0.2034	0.2047	0.2276	0.2119
240	0.2115	0.2425	0.2436	0.2618	0.2307	0.2349	0.222	0.2302	0.2064	0.2377	0.2543	0.2315	0.351	0.2536	0.439	0.3346	0.2837	0.32	0.2787	0.3225	0.2363	0.3155	0.2986	0.3695	0.1893	0.2169	0.2256	0.2142	0.2077	0.237	0.2385	0.2232	0.2158	0.2199	0.2433	0.23
270	0.2271	0.2551	0.2576	0.2749	0.2441	0.2479	0.2335	0.2428	0.2199	0.2506	0.2722	0.2454	0.3668	0.2671	0.436	0.3762	0.2709	0.3191	0.2844	0.3347	0.2534	0.3339	0.2824	0.4362	0.2065	0.2305	0.2379	0.2242	0.2218	0.2496	0.2535	0.2435	0.2297	0.2345	0.2585	0.2449
300	0.2362	0.265	0.2711	0.2862	0.2527	0.2528	0.2451	0.2543	0.2305	0.2624	0.2831	0.2567	0.3961	0.2251	0.453	0.3516	0.3156	0.324	0.2914	0.3381	0.2565	0.3314	0.3133	0.3739	0.2099	0.2444	0.2509	0.2348	0.2352	0.2612	0.2682	0.2475	0.2436	0.2494	0.2711	0.2556
330	0.2497	0.2758	0.2826	0.3002	0.2622	0.2672	0.2562	0.2671	0.239	0.2535	0.3014	0.2686	0.3694	0.2796	0.4963	0.4393	0.3218	0.333	0.3098	0.3498	0.2766	0.3451	0.3333	0.3599	0.2205	0.255	0.2624	0.2439	0.2473	0.2737	0.2828	0.2663	0.256	0.2614	0.2884	0.2702
360	0.2608	0.288	0.2978	0.3128	0.2738	0.2785	0.2659	0.2792	0.2511	0.2694	0.3151	0.2788	0.4359	0.2978	0.4794	0.4037	0.3383	0.3453	0.3282	0.3597	0.3094	0.3671	0.3299	0.3553	0.2305	0.2657	0.2733	0.2538	0.262	0.2868	0.2948	0.2654	0.2669	0.2759	0.3021	0.2836
390	0.2756	0.302	0.3099	0.3242	0.2835	0.2896	0.2774	0.289	0.2614	0.2917	0.3178	0.2909	0.4464	0.3117	0.5016	0.4174	0.3401	0.3599	0.3375	0.3518	0.3061	0.3639	0.3561	0.388	0.2427	0.2823	0.2878	0.2668	0.2792	0.2967	0.3107	0.2831	0.2803	0.2913	0.3174	0.2952
420	0.2894	0.3128	0.3243	0.3383	0.2945	0.3068	0.2895	0.3018	0.2741	0.3208	0.3315	0.3045	0.4619	0.3086	0.5116	0.3902	0.3467	0.3765	0.3487	0.3736	0.2793	0.3798	0.3635	0.3897	0.2528	0.295	0.3032	0.278	0.2929	0.3119	0.3274	0.2919	0.2942	0.3062	0.3332	0.3095
450	0.302	0.3259	0.3406	0.357	0.3064	0.3238	0.3026	0.3154	0.2903	0.3216	0.3474	0.3194	0.4056	0.2816	0.5248	0.428	0.36	0.3866	0.3615	0.3739	0.318	0.3842	0.3719	0.4197	0.267	0.3106	0.3211	0.2926	0.3103	0.3283	0.3466	0.2982	0.3125	0.3283	0.3521	0.3254
480	0.3209	0.3414	0.361	0.3736	0.3224	0.3434	0.3146	0.3252	0.3079	0.3446	0.3723	0.3366	0.393	0.2836	0.516	0.4747	0.3692	0.3846	0.375	0.3813	0.3067	0.4018	0.3923	0.4054	0.2823	0.3313	0.3407	0.3107	0.3328	0.3462	0.3681	0.312	0.3335	0.3538	0.3702	0.3435
510	0.3388	0.3601	0.3818	0.3939	0.3441	0.3607	0.3361	0.3425	0.3313	0.3667	0.386	0.3602	0.4539	0.2617	0.5103	0.4419	0.3916	0.409	0.3819	0.3949	0.3068	0.3806	0.405	0.4384	0.3017	0.3555	0.3647	0.3285	0.355	0.3688	0.3949	0.3432	0.3552	0.3765	0.395	0.3685
540	0.3549	0.3762	0.4073	0.4158	0.3677	0.3835	0.3567	0.3596	0.3537	0.3665	0.401	0.3837	0.4826	0.266	0.5475	0.4166	0.4652	0.4097	0.3951	0.4138	0.3189	0.3895	0.4244	0.45	0.3182	0.3817	0.3932	0.3468	0.3947	0.3904	0.4211	0.3772	0.3785	0.4058	0.4188	0.3902
570	0.3779	0.3936	0.4333	0.4382	0.3938	0.406	0.3789	0.3776	0.374	0.3886	0.4248	0.4079	0.4571	0.3105	0.5032	0.4392	0.4306	0.4307	0.4125	0.4225	0.3275	0.4417	0.4366	0.4507	0.3412	0.4107	0.4239	0.3666	0.407	0.4157	0.4486	0.3978	0.4011	0.4347	0.4468	0.4194
600	0.3999	0.4155	0.4629	0.4607	0.4195	0.4322	0.4013	0.3964	0.3991	0.4244	0.4522	0.4324	0.4828	0.3372	0.5038	0.4374	0.4364	0.4526	0.434	0.4347	0.324	0.4655	0.4501	0.4869	0.3701	0.4412	0.4552	0.3921	0.4408	0.4397	0.4754	0.4284	0.4273	0.4625	0.4748	0.4474
630	0.4233	0.4387	0.4881	0.4849	0.4478	0.4613	0.4244	0.416	0.4224	0.4413	0.4721	0.4552	0.49	0.3505	0.5342	0.4973	0.449	0.4303	0.4499	0.4514	0.3413	0.4538	0.4671	0.465	0.3932	0.4695	0.4852	0.4128	0.4658	0.4655	0.498	0.4512	0.458	0.4894	0.4996	0.4742
660	0.4511	0.4606	0.5135	0.5086	0.4724	0.4846	0.4462	0.4367	0.4438	0.4702	0.4872	0.4781	0.498	0.3475	0.5408	0.4929	0.4565	0.4819	0.4515	0.4666	0.3368	0.4698	0.4737	0.4583	0.4158	0.4939	0.5117	0.4347	0.4926	0.4872	0.5144	0.4805	0.4776	0.5098	0.5209	0.4974
690	0.477	0.4783	0.5371	0.5267	0.4971	0.5056	0.4658	0.4552	0.4653	0.5023	0.5061	0.4953	0.4884	0.3675	0.4615	0.4965	0.4825	0.5105	0.4625	0.4679	0.3415	0.5229	0.4655	0.4991	0.4387	0.5175	0.5334	0.4551	0.5248	0.5091	0.5293	0.4951	0.4967	0.5257	0.5386	0.5137
720	0.4972	0.4903	0.5489	0.5399	0.5138	0.518	0.4818	0.4631	0.4773	0.5175	0.5235	0.5065	0.5225	0.3696	0.4881	0.4938	0.4683	0.5169	0.4858	0.4904	0.3254	0.5257	0.4615	0.501	0.4491	0.5308	0.5503	0.4638	0.5265	0.5259	0.5412	0.5014	0.5081	0.5384	0.5545	0.5274
750	0.5133	0.4971	0.5592	0.5497	0.526	0.5291	0.4864	0.4677	0.4868	0.5122	0.5368	0.5054	0.5169	0.3728	0.4827	0.4998	0.4885	0.5191	0.4951	0.5036	0.3441	0.5323	0.4927	0.5587	0.4516	0.5395	0.5648	0.4736	0.541	0.5345	0.5483	0.5047	0.5234	0.5454	0.5658	0.5363
780	0.52	0.5023	0.5614	0.554	0.5305	0.5414	0.4927	0.4765	0.493	0.5107	0.5388	0.5106	0.5437	0.364	0.4851	0.5061	0.4762	0.5146	0.4878	0.4974	0.3516	0.5331	0.4742	0.5051	0.4635	0.5476	0.5721	0.4814	0.5479	0.5354	0.5441	0.5066	0.5229	0.5491	0.5735	0.54
810	0.5299	0.5055	0.568	0.5593	0.5387	0.5481	0.4974	0.481	0.4967	0.516	0.5451	0.5151	0.5685	0.3281	0.4715	0.4936	0.4494	0.5279	0.4892	0.5001	0.3452	0.5339	0.486	0.5503	0.4722	0.5529	0.5762	0.4885	0.5598	0.5398	0.5473	0.5126	0.5291	0.5535	0.5789	0.5457
840	0.5316	0.5059	0.5647	0.5622	0.5418	0.5486	0.499	0.4816	0.497	0.5307	0.5415	0.5161	0.5506	0.3495	0.4644	0.5134	0.4737	0.5237	0.4791	0.483	0.3441	0.5262	0.4847	0.565	0.4798	0.5528	0.578	0.491	0.5715	0.5414	0.5475	0.516	0.5284	0.5523	0.5786	0.5466
870	0.5346	0.5066	0.5647	0.5626	0.5426	0.5508	0.4982	0.4798	0.4975	0.5336	0.5335	0.5188	0.5215	0.366	0.4902	0.5069	0.4857	0.4879	0.4768	0.4943	0.3364	0.5464	0.4656	0.5351	0.4774	0.5538	0.579	0.4966	0.5665	0.5448	0.5451	0.5084	0.5259	0.5512	0.5794	0.5469
900	0.5363	0.5064	0.5642	0.5648	0.5445	0.5493	0.5002	0.4809	0.4984	0.5522	0.5263	0.5201	0.545	0.3457	0.4906	0.5053	0.463	0.5255	0.4775	0.5028	0.3246	0.4969	0.4562	0.5452	0.4816	0.5572	0.5795	0.4996	0.5672	0.5464	0.5441	0.4957	0.5284	0.5564	0.5805	0.5475
930	0.5367	0.5061	0.5617	0.5638	0.5433	0.5494	0.4995	0.4813	0.4947	0.5792	0.5096	0.5175	0.5784	0.3429	0.4857	0.4902	0.4692	0.5253	0.4739	0.4967	0.3099	0.5065	0.4469	0.5463	0.4787	0.5574	0.5774	0.5018	0.5666	0.5456	0.5416	0.4963	0.5238	0.5534	0.5794	0.5467

## Sheet: FEEDING Gal 0.1 Glu 0.01
Supplementary Dataset 5
Raw data for the fluorescence measurment over time of BY4741 pGAL1::YFP treated or not with chemically synthesized G4CP2 and the random CP11 peptide
Gal/Glu=10:1		Gal 0.1%+Glu 0.01%
G4CP2 100uM
CP11 100uM
n=12	YFP/OD
	CTRL												G4CP2												CP11
Time (min)
0	2.56034	2.70008	2.36968	2.29789	2.50611	2.33623	1.97185	1.88721	2.1419	2.25094	2.30859	2.07346	1.91369	1.95462	1.51153	1.68636	1.85952	1.66128	1.5503	1.96926	1.67728	1.93003	1.75322	1.46205	1.81885	2.04679	2.43533	2.41907	2.32739	2.42663	2.1519	2.13962	2.3916	1.92536	2.56186	1.71752
30	2.23768	2.30459	2.15557	2.06937	2.228	2.05638	1.98143	1.82964	1.91331	1.94171	2.15201	2.02274	1.43948	2.10769	1.38101	1.31487	2.24131	1.53411	1.41964	1.5179	1.62405	2.52535	1.91648	1.96584	1.75108	1.73487	2.06948	2.00236	1.92176	1.99699	2.03054	1.85859	2.2164	1.77719	2.32194	1.63791
60	2.29677	2.41672	2.20255	2.20035	2.1337	2.10706	2.10413	1.95627	1.97009	2.01818	2.24253	2.03324	1.54478	2.28056	1.31646	1.34238	2.42839	1.28979	1.64215	1.19778	1.66169	2.56164	1.72523	1.20386	1.75141	1.74167	2.16567	1.99126	2.026	1.80315	2.08117	1.8524	2.22319	1.82254	2.20381	1.58107
90	2.53189	2.53408	2.37625	2.48841	2.49412	2.36791	2.27354	2.26169	2.36339	2.27932	2.55962	2.25069	1.53641	2.38281	1.64094	1.49138	2.52432	1.38203	1.84981	1.4116	1.9261	2.98597	1.49982	1.88177	2.09495	2.0643	2.39261	2.27051	2.20658	2.14689	2.30392	2.1326	2.41414	2.12998	2.64994	2.0076
120	3.12261	3.39224	3.04019	3.06809	3.37758	3.25155	3.00939	2.88657	2.87732	3.15781	3.16237	2.86703	2.11571	2.81639	2.02408	1.97775	3.16433	1.86058	2.34518	1.94675	2.38971	3.26369	2.1232	2.49658	2.65304	2.94198	3.16186	3.00316	3.00544	2.87891	3.17168	2.80197	3.05173	2.71442	3.19455	2.61706
150	4.28737	4.75196	4.2773	4.54991	4.23655	4.25014	4.06816	3.95894	4.13552	4.25316	4.3466	3.94284	3.27519	3.51148	2.97892	2.89808	3.82751	2.60819	3.09581	2.78038	2.92319	3.89347	2.92505	3.30625	3.69684	4.06073	4.65379	3.98136	4.04307	3.94003	4.28875	4.01993	4.14333	4.00047	4.31484	3.60146
180	6.29337	6.54513	6.2193	6.4893	6.36631	6.12429	6.01337	5.48187	6.02646	5.97156	6.11662	5.53922	4.60047	4.98503	4.29825	4.50412	5.71892	4.21586	4.87846	4.35311	3.99586	5.58226	4.34601	4.64423	5.35714	5.66029	6.77839	5.77192	5.6396	5.93107	6.31525	5.9596	6.07182	5.79744	6.20102	5.4016
210	8.88552	9.79142	9.18934	9.3034	9.13377	8.96435	8.78866	7.89256	8.63924	8.62467	8.93165	8.48403	8.37692	7.58942	5.84298	6.46248	8.17414	5.81619	7.14657	6.28384	5.96229	6.53627	6.28824	6.0862	7.76695	8.31522	10.1239	7.79837	8.53371	8.51449	9.16409	8.44638	8.77639	8.39227	8.77563	7.62775
240	13.006	13.8977	13.2233	13.8395	13.1514	12.7722	12.6076	11.4813	12.4895	12.4465	13.1329	12.2515	11.3583	10.5793	9.26815	9.33655	11.0612	9.01769	9.33204	9.24503	9.17347	9.52895	9.94554	13.6674	10.6075	11.9278	14.3207	11.2864	11.8602	11.9179	13.1423	12.0482	12.3139	12.231	12.4686	11.0713
270	18.5266	19.9769	19.1644	18.9501	18.4146	18.283	17.7739	16.2361	17.4884	17.4025	17.7599	16.6048	16.3315	14.5968	13.2732	13.5087	14.8417	12.6885	12.5321	12.9891	12.0948	12.623	14.2287	16.9104	15.6038	16.4716	20.2714	15.3774	16.4706	17.522	18.5388	17.1222	17.2366	16.8494	17.9785	15.0933
300	25.6517	27.2933	26.5236	25.5262	24.7811	24.6044	24.3247	22.8657	23.8622	24.5339	25.6823	23.0031	21.9802	19.9795	18.8051	20.1821	20.335	17.7086	16.421	17.365	15.7342	16.9513	20.7643	24.1307	20.942	21.783	27.4131	21.2028	21.7195	23.3952	25.5778	23.3541	23.5227	22.9204	23.661	20.7716
330	33.8088	35.988	36.132	33.8352	32.428	33.1641	32.8634	30.8194	31.8594	32.321	33.6914	31.1566	27.2877	26.6814	23.951	26.2862	27.7706	22.8352	22.6308	22.3812	23.0095	22.0565	26.3476	27.2816	27.7768	28.7346	35.5897	28.4365	28.8063	31.7035	33.2425	30.4152	31.3081	30.2783	31.6156	27.7795
360	44.4803	45.5072	44.3635	42.1823	41.1099	41.5853	40.7207	38.9789	38.8548	41.4361	42.5851	38.8253	34.0641	32.4065	29.2103	32.7362	35.4631	28.7114	29.7525	27.7295	35.2838	30.7005	33.098	42.8679	35.0088	35.7863	43.4489	34.8872	36.6463	39.5219	42.5	37.8877	39.2422	38.2441	38.1303	36.5815
390	52.8321	54.9689	53.7518	51.587	50.2763	50.0356	49.2421	47.6257	47.1029	50.3214	51.8974	43.2795	44.2364	37.1748	33.7202	37.4968	41.639	34.8608	35.2684	32.131	35.0185	36.0851	39.116	50.5651	42.7	43.177	52.3747	42.3704	43.3479	48.1235	50.4854	46.0905	47.5203	46.0993	49.871	43.1407
420	63.2353	62.4504	63.653	58.1622	59.8532	59.8135	58.0516	57.0467	55.6979	59.4937	61.8577	48.4532	48.2502	42.4748	40.3977	40.7245	48.6304	40.8178	41.4163	37.9949	40.8939	38.1527	45.5969	57.5203	50.4955	50.0622	61.2116	51.1907	52.0022	56.8829	59.3003	53.1362	55.9338	54.5054	59.2537	53.5996
450	68.1454	71.2644	70.8939	68.7685	68.7595	68.4286	65.5808	64.8955	63.8778	67.8022	69.1364	64.7476	58.5692	47.5099	43.1331	47.4843	56.5466	45.2398	50.883	42.775	45.9767	44.5348	50.7348	77.7911	58.1608	56.8383	68.5148	58.7253	59.2652	64.4434	66.6952	61.1302	63.6881	62.8495	67.8693	62.6711
480	81.0861	80.2193	78.9096	75.8784	78.36	76.6742	74.2311	74.1841	71.6148	76.5668	78.0036	72.7773	66.1692	51.1402	49.714	53.7745	63.5043	50.7091	58.8479	47.6788	61.3333	45.3696	56.6089	65.7309	66.1444	64.9728	75.9923	67.8554	68.4619	72.8143	74.4339	69.2727	71.5763	69.6892	74.9889	69.8147
510	86.6667	87.4407	85.9149	83.0929	87.4829	83.0368	81.1881	82.4709	80.4697	85.4319	86.3714	80.4374	71.2131	56.891	53.3465	63.0369	70.9045	56.8627	64.1936	51.5402	67.0435	49.2195	63.2768	73.9004	73.2477	71.7416	83.9475	76.4013	75.4263	81.6708	82.4706	76.7919	79.2141	77.0228	81.4267	79.3658
540	94.7523	95.384	92.2671	91.1652	95.1641	93.494	89.8197	90.6995	85.9785	85.6441	93.9576	94.2155	85.4844	68.195	55.2331	65.4144	76.64	61.8698	66.7827	56.3906	66.167	59.7558	69.2586	102.292	80.6037	77.8332	89.0872	84.0764	83.7929	88.3534	89.6565	84.2623	85.519	84.0551	93.5043	84.9679
570	100.862	102.067	101.135	98.1681	102.321	101.857	96.4887	98.3224	93.709	97.7828	98.8042	97.006	80.7892	68.645	62.049	68.2212	82.9804	70.1843	71.2415	60.4667	70.4333	61.7714	71.7328	87.9711	86.5258	84.3144	95.6734	89.1915	89.3637	96.2656	96.4435	90.965	91.7671	89.3372	98.1018	92.2729
600	107.535	109.182	110.013	106.546	109.37	109.162	104.064	105.397	99.5778	101.77	107.888	102.708	80.6993	71.1703	66.4141	70.9062	90.1646	74.6318	76.7239	64.613	78.5069	61.2779	72.7831	73.8046	92.0546	89.5127	101.554	98.3647	98.7202	101.699	102.664	97.0614	96.956	95.643	100.248	100.872
630	112.979	114.932	115.895	112.156	115.144	114.858	109.082	111.377	103.813	104.986	112.212	103.294	80.3179	74.5206	68.97	70.7185	91.869	90.6627	77.6907	67.3024	78.5891	69.0994	70.8694	87.9748	98.0271	94.9896	106.144	102.536	105.105	107.928	107.373	102.356	102.684	100.797	103.448	104.616
660	119.799	119.124	124.347	117.868	119.579	120.792	114.476	118.665	106.782	108.571	115.18	116.141	84.7431	73.5035	69.0746	72.5602	95.7113	104.515	81.2429	70.1573	80.2776	69.0236	77.3545	76.7352	101.78	101.656	110.568	110.14	111.63	115.6	110.932	106.923	106.376	106.298	113.874	112.595
690	123.137	123.115	128.144	120.535	124.315	125.882	117.545	123.455	109.965	108.878	121.27	119.593	79.9641	76.351	71.0886	75.6757	98.9601	112.119	86.2814	71.0574	78.122	81.0089	79.4028	74.7706	104.359	104.261	113.146	115.094	117.107	119.444	113.398	109.687	108.656	109.478	115.111	118.656
720	124.081	122.796	130.519	120.451	123.168	127.092	118.557	124.481	109.284	107.877	122.287	120.095	85.4462	79.7794	73.1664	73.195	93.7625	105.926	82.4422	73.1538	78.8535	82.012	80.295	123.856	104.795	106.743	113.389	118.28	121.292	121.871	113.998	111.459	108.597	109.935	117.337	119.746
750	121.508	121.481	132.692	119.923	122.552	126.366	119.306	125.787	109.23	106.316	121.521	125.132	85.9152	78.3707	72.1213	75.8683	92.4728	104.133	82.586	71.4173	78.901	83.4797	80.451	138.438	104.625	106.223	114.072	120.982	125.337	123.979	115.024	112.467	108.695	110.007	119.63	122.713
780	120.759	119.884	131.79	118.271	122.092	124.041	118.614	125.223	108.419	105.053	120.895	123.837	88.5535	76.7473	73.8789	77.1445	94.548	102.6	79.6846	73.0535	75.3769	80.4391	75.0488	108.874	104.045	105.334	112.483	121.824	127.401	125.76	113.104	113.399	107.059	108.717	116.795	122.373
810	120.465	120.632	132.644	117.897	121.634	124.106	119.351	126.211	108.171	105.327	120.899	126.694	96.0519	80.563	72.0048	73.975	93.6644	118.496	77.2363	73.7804	80.8255	92.2443	77.2084	92.6161	105.352	105.68	111.848	120.647	126.771	125.116	113.213	114.218	106.259	109.595	116.253	127.801
840	121.99	120.643	138.632	119.531	121.853	125.438	118.808	129.855	109.625	106.412	120.122	127.671	90.3806	81.7194	74.3531	72.9096	91.4774	80.1396	76.2236	74.6714	77.9852	100.428	79.961	96.8666	105.846	106.413	112.814	121.126	127.43	125.493	112.07	116.415	106.677	109.161	119.024	123.261
870	123.716	122.129	140.964	119.333	123.038	126.393	121.875	132.606	111.231	108.603	122.202	131.515	92.7038	81.1817	77.8465	74.6097	90.1573	84.3084	79.5082	74.2641	79.0766	97.7262	80.6438	79.3318	106.534	107.701	112.761	121.666	127.709	126.795	112.193	118.813	107.535	109.637	118.135	125.06
900	125.648	124.135	144.55	122.035	123.901	126.769	124.284	135.084	113.574	109.407	124.585	135.931	93.0878	82.5922	79.0543	78.6048	94.6474	86.3565	80.5734	74.4164	82.5875	96.6174	80.5254	93.3032	107.846	109.432	115.173	121.922	127.61	127.092	115.187	122.664	109.642	111.489	119.342	132.764
930	128.075	125.492	147.441	123.498	127.024	128.335	126.184	138.168	114.918	111.708	126.752	138.969	91.7909	87.7802	80.7592	84.3403	92.2689	84.6883	80.1325	78.0199	84.2142	95.6006	83.3514	68.7888	109.896	112.016	117.133	123.188	128.479	128.561	115.551	125.414	110.867	112.78	121.407	138.723
n=12	YFP
	CTRL												G4CP2												CP11
Time (min)
0	0.3564	0.3448	0.3455	0.3371	0.3283	0.3224	0.3222	0.3363	0.3517	0.3588	0.3359	0.3274	0.3326	0.3489	0.3342	0.3339	0.3349	0.3497	0.3375	0.3588	0.3425	0.331	0.3126	0.3294	0.3454	0.3762	0.3709	0.3527	0.3391	0.339	0.34	0.3586	0.353	0.325	0.352	0.3186
30	0.3314	0.3261	0.3367	0.3371	0.3469	0.3319	0.3521	0.3383	0.3465	0.3431	0.3426	0.3469	0.3413	0.3425	0.3447	0.337	0.3548	0.3688	0.3268	0.3476	0.3404	0.3586	0.3511	0.3395	0.3637	0.3612	0.3574	0.3398	0.3267	0.3313	0.359	0.3483	0.3595	0.3382	0.3599	0.3361
60	0.3622	0.3729	0.3632	0.3756	0.3527	0.3641	0.392	0.3713	0.3688	0.3774	0.3754	0.367	0.376	0.3731	0.364	0.3709	0.3747	0.3841	0.3841	0.3773	0.3674	0.374	0.3535	0.3496	0.3727	0.3762	0.3974	0.3644	0.3663	0.3325	0.3923	0.374	0.3835	0.3687	0.3698	0.3491
90	0.4089	0.4052	0.4042	0.4295	0.4245	0.4177	0.4297	0.4304	0.4429	0.4276	0.4336	0.4094	0.4156	0.4158	0.4465	0.4413	0.4203	0.4598	0.4323	0.4551	0.417	0.447	0.4117	0.4902	0.4479	0.4527	0.4534	0.4289	0.4091	0.4107	0.4412	0.4455	0.4302	0.4441	0.4595	0.4493
120	0.5068	0.5509	0.522	0.5317	0.5725	0.5765	0.5766	0.5522	0.5418	0.5943	0.5395	0.5261	0.5668	0.5154	0.5548	0.6044	0.5642	0.6499	0.5544	0.6983	0.52	0.5124	0.5756	0.6209	0.5712	0.649	0.6134	0.5706	0.5521	0.5611	0.6115	0.5985	0.5545	0.5741	0.5632	0.5645
150	0.7027	0.7893	0.7404	0.7885	0.7164	0.751	0.7819	0.7617	0.7812	0.8064	0.7424	0.7243	0.7736	0.8108	0.8338	0.9071	0.7234	0.9679	0.7529	1.009	0.8296	0.709	0.8313	0.8831	0.7963	0.8893	0.9154	0.7477	0.7322	0.7687	0.8273	0.8675	0.7574	0.8441	0.762	0.7916
180	1.034	1.095	1.089	1.122	1.081	1.084	1.169	1.058	1.139	1.134	1.049	1.017	1.163	1.332	1.274	1.367	1.058	1.457	1.164	1.541	1.158	1.045	1.246	1.449	1.155	1.243	1.355	1.073	1.014	1.153	1.222	1.298	1.116	1.225	1.092	1.15
210	1.467	1.643	1.621	1.616	1.55	1.584	1.705	1.528	1.638	1.643	1.555	1.567	1.858	2.037	2.069	2.532	1.549	2.12	1.926	2.205	1.834	1.604	1.85	2.104	1.673	1.836	2.042	1.431	1.519	1.645	1.776	1.843	1.621	1.78	1.541	1.627
240	2.172	2.364	2.363	2.415	2.241	2.276	2.461	2.24	2.388	2.386	2.272	2.28	2.634	2.94	3.242	3.87	2.116	3.415	2.878	3.441	2.697	2.65	2.922	3.123	2.305	2.642	2.92	2.053	2.104	2.293	2.568	2.647	2.299	2.626	2.182	2.253
270	3.131	3.454	3.486	3.339	3.171	3.269	3.537	3.205	3.391	3.39	3.195	3.13	3.655	4.29	5.154	5.571	2.86	4.965	3.999	4.893	3.701	3.542	4.132	4.324	3.411	3.66	4.182	2.791	2.912	3.387	3.654	3.796	3.256	3.658	3.184	2.913
300	4.448	4.82	4.944	4.536	4.302	4.478	4.899	4.564	4.677	4.843	4.592	4.389	4.873	5.844	7.334	7.425	4.006	7.025	5.391	6.689	5.079	4.982	5.814	6.093	4.624	4.899	5.754	3.878	3.84	4.541	5.113	5.243	4.514	5.07	4.285	4.038
330	6.329	6.575	7.006	6.158	5.743	6.142	6.76	6.281	6.391	6.545	6.179	6.088	6.781	7.823	10.16	9.718	5.593	9.198	7.226	8.431	7.057	6.714	7.596	8.621	6.222	6.517	7.634	5.238	5.116	6.309	6.828	6.959	6.127	6.855	5.988	5.467
360	8.131	8.569	8.886	7.867	7.445	7.922	8.645	8.131	7.973	8.656	8.006	7.8	8.608	10.14	12.54	12.06	7.121	11.43	8.777	10.54	9.075	9.072	9.658	11.42	7.989	8.238	9.524	6.496	6.589	8.019	8.959	8.843	7.923	8.93	7.668	6.87
390	10.26	10.62	11.39	9.817	9.281	9.832	10.72	10.23	9.934	10.96	10.12	9.911	10.63	12.29	15.11	14.8	9.019	14.15	11.3	12.56	10.39	11.54	11.77	13.87	10.09	10.22	11.91	8.008	7.911	9.976	10.92	11.2	9.946	11.05	9.665	8.434
420	12.47	12.59	13.94	11.33	11.42	12.19	13.05	12.71	12.17	13.63	12.52	12.06	12.96	13.49	17.88	17.65	10.83	16.67	13.51	14.97	13.45	12.64	13.98	16.33	12.23	12.07	14.55	9.931	9.558	12.19	13.39	13.3	12.16	13.61	11.75	10.87
450	14.44	14.88	16.1	13.96	13.58	14.37	15.3	14.9	14.43	16.32	14.65	14.62	14.9	15.55	20.54	20.48	12.87	19.15	15.27	17.85	14.97	14.79	16.57	19.51	14.61	14.13	16.93	11.61	11.13	14.3	15.58	16.01	14.54	16.41	13.92	13.28
480	17.32	17.56	18.67	15.98	16.15	17.06	17.86	17.73	17.03	19.67	17.27	17.19	17.29	16.82	23.47	23.08	14.86	21.81	18.49	20.13	17.48	16.51	18.93	21.54	17.31	16.75	19.72	13.89	13.22	16.74	18.08	19.05	17.3	19.06	16.85	15.45
510	19.5	20.26	21.41	18.43	19.15	20.07	20.5	20.56	20.56	23.34	20.28	20.23	21.25	19.36	27.1	27.15	17.01	24.65	22.41	22.42	19.57	20.18	22.4	25.37	19.96	19.32	23.01	16.22	15.04	19.65	21.03	22.07	20.16	21.99	18.72	18.77
540	22.57	23.35	24.46	21.36	22.04	23.28	23.91	23.6	23.24	26.13	23.48	24.92	24.97	23.5	28.55	28.73	19.16	27	24.95	25.06	21.63	26.43	24.85	26.33	23.23	21.84	25.96	18.48	17.32	22	24.01	25.7	23.15	25.04	21.88	19.84
570	25.74	26.66	28.51	24.65	25.57	26.87	26.93	26.96	27.11	29.99	26.44	27.54	28.05	26.14	32.16	30.72	20.77	29.33	27.2	27.47	24.06	18.97	27.28	29.18	26.2	24.78	29.41	20.63	19.24	25.52	27.66	29.6	26.64	27.9	24.29	22.45
600	29.97	30.56	32.96	28.81	29.18	30.86	30.47	30.66	30.66	34.5	31.87	31.1	34.16	28.34	35.06	35.29	23.01	31.92	29.93	29.05	26.92	23.88	27.25	31.95	29.66	27.74	33.33	24.06	22.37	28.14	31.21	33.36	29.94	31.61	28.25	24.28
630	33.34	34.56	37.04	32.2	33.15	34.71	33.63	34.85	34.03	37.69	35.01	35.43	34.36	31.09	37.23	37.99	24.97	33.79	32.7	31.76	28.52	32.38	29.51	33.58	33.29	31.85	36.97	26.28	25.12	31.04	34.37	37.37	34.05	35.42	31.2	27.65
660	38.06	38.62	42.34	36.15	36.89	39.33	37.88	39.48	37.79	42.18	39.76	40.87	37.27	31.68	38.44	39.48	27.45	35.42	35.95	33.9	30.65	33.58	32.69	33.94	36.6	34.99	40.91	30.74	28.22	35.94	38.56	41.39	37.87	39.83	35.54	32.72
690	42.31	42.77	46.67	39.21	40.85	43.53	41.47	43.95	41.38	45.01	44.87	44.62	35.64	33.06	40.03	41.44	28.55	38.3	36.73	35.01	32.28	38.22	33.77	35.86	39.74	38.17	44.24	34.16	31.49	39.56	41.98	45.18	41.3	43.43	38.85	36.89
720	45.55	44.98	50.08	41.64	42.85	46.77	44.21	46.73	43.32	46.29	47.9	48.05	39.16	32.55	41.5	41.26	32.77	38.97	37.47	36.95	33.15	39.62	34.84	35.2	41.74	40.84	46.58	37.27	34.35	42.35	44.71	48.44	43.2	45.7	42.57	38.69
750	47.06	46.43	53.09	43.64	45.43	48.55	46.1	49.17	44.85	47.47	49.52	51.98	37.88	32.9	42.09	42.16	33.17	40.06	37.94	36.18	34.03	40.88	35.68	35.98	43.43	41.99	48.88	40.65	38.14	44.93	47.16	51.6	45.13	47.49	44.67	42.25
780	48.69	47.39	54.64	44.73	47.97	49.17	46.9	50.64	46.23	47.82	51.61	52.73	38.14	34.26	41.35	41.28	33.99	40.65	38.4	37.25	34.5	40.67	34.59	33.37	44.24	43.05	49.92	43.15	40.59	47.6	48.42	53.91	45.8	48.64	47.08	47.04
810	49.74	49.23	57.09	45.98	48.69	50.35	48.17	52.1	47.13	48.84	52.47	55.34	36.25	33.2	41.77	41.5	34.89	40.17	37.56	37.96	33.68	38.06	36.01	37.88	45.67	44.28	50.79	44.41	42.24	48.67	50.21	55.59	46.52	50.37	48.28	47.9
840	50.87	49.91	60.79	47.43	49.57	52.22	48.64	54.76	48.29	49.95	53.19	57.72	39.18	35.36	42.53	40.72	35.85	45.92	37.22	38.06	33.83	39.87	36.95	36.17	46.35	45.63	52.12	46.27	44.18	50.26	50.51	57.73	47.29	50.88	50.24	51.4
870	52.01	51.05	62.56	48.27	50.95	53.3	50.7	56.49	49.62	51.38	54.71	59.3	40.15	34.9	45.33	42.05	37.83	43.09	37.83	38.35	34.77	40.4	37.08	37.04	47.12	46.99	52.31	47.62	45.26	51.91	51.62	59.68	48.52	51.99	50.68	52.25
900	53.3	52.41	65.12	49.9	51.84	53.94	52.05	58.37	51.04	51.87	56.35	62.27	40.94	34.92	46.31	43.72	37.31	43.8	37.66	39.21	35.62	43.13	37.09	37.2	48.52	48.73	54.12	48.72	46.45	52.54	53.32	62.62	49.92	53.08	51.89	52.11
930	54.56	53.51	66.54	50.56	53.35	55.12	53.01	60.02	51.69	52.86	57.52	62.8	41.26	35.63	46.59	44.81	38.43	44.69	36.3	41.53	35.85	44.33	38.35	34.36	49.64	50.34	55.24	50.31	47.64	53.52	53.87	64.35	51.01	53.92	53.31	51.05
n=12	OD
	CTRL												G4CP2												CP11
Time (min)
0	0.1392	0.1277	0.1458	0.1467	0.131	0.138	0.1634	0.1782	0.1642	0.1594	0.1455	0.1579	0.1738	0.1785	0.2211	0.198	0.1801	0.2105	0.2177	0.1822	0.2042	0.1715	0.1783	0.2253	0.1899	0.1838	0.1523	0.1458	0.1457	0.1397	0.158	0.1676	0.1476	0.1688	0.1374	0.1855
30	0.1481	0.1415	0.1562	0.1629	0.1557	0.1614	0.1777	0.1849	0.1811	0.1767	0.1592	0.1715	0.2371	0.1625	0.2496	0.2563	0.1583	0.2404	0.2302	0.229	0.2096	0.142	0.1832	0.1727	0.2077	0.2082	0.1727	0.1697	0.17	0.1659	0.1768	0.1874	0.1622	0.1903	0.155	0.2052
60	0.1577	0.1543	0.1649	0.1707	0.1653	0.1728	0.1863	0.1898	0.1872	0.187	0.1674	0.1805	0.2434	0.1636	0.2765	0.2763	0.1543	0.2978	0.2339	0.315	0.2211	0.146	0.2049	0.2904	0.2128	0.216	0.1835	0.183	0.1808	0.1844	0.1885	0.2019	0.1725	0.2023	0.1678	0.2208
90	0.1615	0.1599	0.1701	0.1726	0.1702	0.1764	0.189	0.1903	0.1874	0.1876	0.1694	0.1819	0.2705	0.1745	0.2721	0.2959	0.1665	0.3327	0.2337	0.3224	0.2165	0.1497	0.2745	0.2605	0.2138	0.2193	0.1895	0.1889	0.1854	0.1913	0.1915	0.2089	0.1782	0.2085	0.1734	0.2238
120	0.1623	0.1624	0.1717	0.1733	0.1695	0.1773	0.1916	0.1913	0.1883	0.1882	0.1706	0.1835	0.2679	0.183	0.2741	0.3056	0.1783	0.3493	0.2364	0.3587	0.2176	0.157	0.2711	0.2487	0.2153	0.2206	0.194	0.19	0.1837	0.1949	0.1928	0.2136	0.1817	0.2115	0.1763	0.2157
150	0.1639	0.1661	0.1731	0.1733	0.1691	0.1767	0.1922	0.1924	0.1889	0.1896	0.1708	0.1837	0.2362	0.2309	0.2799	0.313	0.189	0.3711	0.2432	0.3629	0.2838	0.1821	0.2842	0.2671	0.2154	0.219	0.1967	0.1878	0.1811	0.1951	0.1929	0.2158	0.1828	0.211	0.1766	0.2198
180	0.1643	0.1673	0.1751	0.1729	0.1698	0.177	0.1944	0.193	0.189	0.1899	0.1715	0.1836	0.2528	0.2672	0.2964	0.3035	0.185	0.3456	0.2386	0.354	0.2898	0.1872	0.2867	0.312	0.2156	0.2196	0.1999	0.1859	0.1798	0.1944	0.1935	0.2178	0.1838	0.2113	0.1761	0.2129
210	0.1651	0.1678	0.1764	0.1737	0.1697	0.1767	0.194	0.1936	0.1896	0.1905	0.1741	0.1847	0.2218	0.2684	0.3541	0.3918	0.1895	0.3645	0.2695	0.3509	0.3076	0.2454	0.2942	0.3457	0.2154	0.2208	0.2017	0.1835	0.178	0.1932	0.1938	0.2182	0.1847	0.2121	0.1756	0.2133
240	0.167	0.1701	0.1787	0.1745	0.1704	0.1782	0.1952	0.1951	0.1912	0.1917	0.173	0.1861	0.2319	0.2779	0.3498	0.4145	0.1913	0.3787	0.3084	0.3722	0.294	0.2781	0.2938	0.2285	0.2173	0.2215	0.2039	0.1819	0.1774	0.1924	0.1954	0.2197	0.1867	0.2147	0.175	0.2035
270	0.169	0.1729	0.1819	0.1762	0.1722	0.1788	0.199	0.1974	0.1939	0.1948	0.1799	0.1885	0.2238	0.2939	0.3883	0.4124	0.1927	0.3913	0.3191	0.3767	0.306	0.2806	0.2904	0.2557	0.2186	0.2222	0.2063	0.1815	0.1768	0.1933	0.1971	0.2217	0.1889	0.2171	0.1771	0.193
300	0.1734	0.1766	0.1864	0.1777	0.1736	0.182	0.2014	0.1996	0.196	0.1974	0.1788	0.1908	0.2217	0.2925	0.39	0.3679	0.197	0.3967	0.3283	0.3852	0.3228	0.2939	0.28	0.2525	0.2208	0.2249	0.2099	0.1829	0.1768	0.1941	0.1999	0.2245	0.1919	0.2212	0.1811	0.1944
330	0.1872	0.1827	0.1939	0.182	0.1771	0.1852	0.2057	0.2038	0.2006	0.2025	0.1834	0.1954	0.2485	0.2932	0.4242	0.3697	0.2014	0.4028	0.3193	0.3767	0.3067	0.3044	0.2883	0.316	0.224	0.2268	0.2145	0.1842	0.1776	0.199	0.2054	0.2288	0.1957	0.2264	0.1894	0.1968
360	0.1828	0.1883	0.2003	0.1865	0.1811	0.1905	0.2123	0.2086	0.2052	0.2089	0.188	0.2009	0.2527	0.3129	0.4293	0.3684	0.2008	0.3981	0.295	0.3801	0.2572	0.2955	0.2918	0.2664	0.2282	0.2302	0.2192	0.1862	0.1798	0.2029	0.2108	0.2334	0.2019	0.2335	0.2011	0.1878
390	0.1942	0.1932	0.2119	0.1903	0.1846	0.1965	0.2177	0.2148	0.2109	0.2178	0.195	0.229	0.2403	0.3306	0.4481	0.3947	0.2166	0.4059	0.3204	0.3909	0.2967	0.3198	0.3009	0.2743	0.2363	0.2367	0.2274	0.189	0.1825	0.2073	0.2163	0.243	0.2093	0.2397	0.1938	0.1955
420	0.1972	0.2016	0.219	0.1948	0.1908	0.2038	0.2248	0.2228	0.2185	0.2291	0.2024	0.2489	0.2686	0.3176	0.4426	0.4334	0.2227	0.4084	0.3262	0.394	0.3289	0.3313	0.3066	0.2839	0.2422	0.2411	0.2377	0.194	0.1838	0.2143	0.2258	0.2503	0.2174	0.2497	0.1983	0.2028
450	0.2119	0.2088	0.2271	0.203	0.1975	0.21	0.2333	0.2296	0.2259	0.2407	0.2119	0.2258	0.2544	0.3273	0.4762	0.4313	0.2276	0.4233	0.3001	0.4173	0.3256	0.3321	0.3266	0.2508	0.2512	0.2486	0.2471	0.1977	0.1878	0.2219	0.2336	0.2619	0.2283	0.2611	0.2051	0.2119
480	0.2136	0.2189	0.2366	0.2106	0.2061	0.2225	0.2406	0.239	0.2378	0.2569	0.2214	0.2362	0.2613	0.3289	0.4721	0.4292	0.234	0.4301	0.3142	0.4222	0.285	0.3639	0.3344	0.3277	0.2617	0.2578	0.2595	0.2047	0.1931	0.2299	0.2429	0.275	0.2417	0.2735	0.2247	0.2213
510	0.225	0.2317	0.2492	0.2218	0.2189	0.2417	0.2525	0.2493	0.2555	0.2732	0.2348	0.2515	0.2984	0.3403	0.508	0.4307	0.2399	0.4335	0.3491	0.435	0.2919	0.41	0.354	0.3433	0.2725	0.2693	0.2741	0.2123	0.1994	0.2406	0.255	0.2874	0.2545	0.2855	0.2299	0.2365
540	0.2382	0.2448	0.2651	0.2343	0.2316	0.249	0.2662	0.2602	0.2703	0.3051	0.2499	0.2645	0.2921	0.3446	0.5169	0.4392	0.25	0.4364	0.3736	0.4444	0.3269	0.4423	0.3588	0.2574	0.2882	0.2806	0.2914	0.2198	0.2067	0.249	0.2678	0.305	0.2707	0.2979	0.234	0.2335
570	0.2552	0.2612	0.2819	0.2511	0.2499	0.2638	0.2791	0.2742	0.2893	0.3067	0.2676	0.2839	0.3472	0.3808	0.5183	0.4503	0.2503	0.4179	0.3818	0.4543	0.3416	0.3071	0.3803	0.3317	0.3028	0.2939	0.3074	0.2313	0.2153	0.2651	0.2868	0.3254	0.2903	0.3123	0.2476	0.2433
600	0.2787	0.2799	0.2996	0.2704	0.2668	0.2827	0.2928	0.2909	0.3079	0.339	0.2954	0.3028	0.4233	0.3982	0.5279	0.4977	0.2552	0.4277	0.3901	0.4496	0.3429	0.3897	0.3744	0.4329	0.3222	0.3099	0.3282	0.2446	0.2266	0.2767	0.304	0.3437	0.3088	0.3305	0.2818	0.2407
630	0.2951	0.3007	0.3196	0.2871	0.2879	0.3022	0.3083	0.3129	0.3278	0.359	0.312	0.343	0.4278	0.4172	0.5398	0.5372	0.2718	0.3727	0.4209	0.4719	0.3629	0.4686	0.4164	0.3817	0.3396	0.3353	0.3483	0.2563	0.239	0.2876	0.3201	0.3651	0.3316	0.3514	0.3016	0.2643
660	0.3177	0.3242	0.3405	0.3067	0.3085	0.3256	0.3309	0.3327	0.3539	0.3885	0.3452	0.3519	0.4398	0.431	0.5565	0.5441	0.2868	0.3389	0.4425	0.4832	0.3818	0.4865	0.4226	0.4423	0.3596	0.3442	0.37	0.2791	0.2528	0.3109	0.3476	0.3871	0.356	0.3747	0.3121	0.2906
690	0.3436	0.3474	0.3642	0.3253	0.3286	0.3458	0.3528	0.356	0.3763	0.4134	0.37	0.3731	0.4457	0.433	0.5631	0.5476	0.2885	0.3416	0.4257	0.4927	0.4132	0.4718	0.4253	0.4796	0.3808	0.3661	0.391	0.2968	0.2689	0.3312	0.3702	0.4119	0.3801	0.3967	0.3375	0.3109
720	0.3671	0.3663	0.3837	0.3457	0.3479	0.368	0.3729	0.3754	0.3964	0.4291	0.3917	0.4001	0.4583	0.408	0.5672	0.5637	0.3495	0.3679	0.4545	0.5051	0.4204	0.4831	0.4339	0.2842	0.3983	0.3826	0.4108	0.3151	0.2832	0.3475	0.3922	0.4346	0.3978	0.4157	0.3628	0.3231
750	0.3873	0.3822	0.4001	0.3639	0.3707	0.3842	0.3864	0.3909	0.4106	0.4465	0.4075	0.4154	0.4409	0.4198	0.5836	0.5557	0.3587	0.3847	0.4594	0.5066	0.4313	0.4897	0.4435	0.2599	0.4151	0.3953	0.4285	0.336	0.3043	0.3624	0.41	0.4588	0.4152	0.4317	0.3734	0.3443
780	0.4032	0.3953	0.4146	0.3782	0.3929	0.3964	0.3954	0.4044	0.4264	0.4552	0.4269	0.4258	0.4307	0.4464	0.5597	0.5351	0.3595	0.3962	0.4819	0.5099	0.4577	0.5056	0.4609	0.3065	0.4252	0.4087	0.4438	0.3542	0.3186	0.3785	0.4281	0.4754	0.4278	0.4474	0.4031	0.3844
810	0.4129	0.4081	0.4304	0.39	0.4003	0.4057	0.4036	0.4128	0.4357	0.4637	0.434	0.4368	0.3774	0.4121	0.5801	0.561	0.3725	0.339	0.4863	0.5145	0.4167	0.4126	0.4664	0.409	0.4335	0.419	0.4541	0.3681	0.3332	0.389	0.4435	0.4867	0.4378	0.4596	0.4153	0.3748
840	0.417	0.4137	0.4385	0.3968	0.4068	0.4163	0.4094	0.4217	0.4405	0.4694	0.4428	0.4521	0.4335	0.4327	0.572	0.5585	0.3919	0.573	0.4883	0.5097	0.4338	0.397	0.4621	0.3734	0.4379	0.4288	0.462	0.382	0.3467	0.4005	0.4507	0.4959	0.4433	0.4661	0.4221	0.417
870	0.4204	0.418	0.4438	0.4045	0.4141	0.4217	0.416	0.426	0.4461	0.4731	0.4477	0.4509	0.4331	0.4299	0.5823	0.5636	0.4196	0.5111	0.4758	0.5164	0.4397	0.4134	0.4598	0.4669	0.4423	0.4363	0.4639	0.3914	0.3544	0.4094	0.4601	0.5023	0.4512	0.4742	0.429	0.4178
900	0.4242	0.4222	0.4505	0.4089	0.4184	0.4255	0.4188	0.4321	0.4494	0.4741	0.4523	0.4581	0.4398	0.4228	0.5858	0.5562	0.3942	0.5072	0.4674	0.5269	0.4313	0.4464	0.4606	0.3987	0.4499	0.4453	0.4699	0.3996	0.364	0.4134	0.4629	0.5105	0.4553	0.4761	0.4348	0.3925
930	0.426	0.4264	0.4513	0.4094	0.42	0.4295	0.4201	0.4344	0.4498	0.4732	0.4538	0.4519	0.4495	0.4059	0.5769	0.5313	0.4165	0.5277	0.453	0.5323	0.4257	0.4637	0.4601	0.4995	0.4517	0.4494	0.4716	0.4084	0.3708	0.4163	0.4662	0.5131	0.4601	0.4781	0.4391	0.368

## Sheet: FEEDING statistics
Supplementary Dataset 5
YFP/OD statistics for the experiment with peptides exogenous feeding (Fig. 4 D,E,F)
	Gal/Glu=1:1		Gal 0.1%+Glu 0.1%							Gal/Glu=10:1		Gal 0.1%+Glu 0.01%
Tukey's multiple comparisons test	Mean Diff,	95,00% CI of diff,	Significant?	Summary	Adjusted P Value				Tukey's multiple comparisons test	Mean Diff,	95,00% CI of diff,	Significant?	Summary	Adjusted P Value
0									0
Ctrl vs G4CP2	0.349	-3,926 to 4,624	No	ns	0.98				Ctrl vs G4CP2	0.5396	-5,248 to 6,327	No	ns	0.974
Ctrl vs CP11	0.03644	-4,238 to 4,311	No	ns	0.9998				Ctrl vs CP11	0.08687	-5,701 to 5,875	No	ns	0.9993
CP11 vs G4CP2	-0.3126	-4,587 to 3,962	No	ns	0.9839				CP11 vs G4CP2	-0.4527	-6,241 to 5,335	No	ns	0.9816
30									30
Ctrl vs G4CP2	0.3756	-3,899 to 4,650	No	ns	0.9768				Ctrl vs G4CP2	0.3254	-5,462 to 6,113	No	ns	0.9904
Ctrl vs CP11	0.07011	-4,205 to 4,345	No	ns	0.9992				Ctrl vs CP11	0.1311	-5,657 to 5,919	No	ns	0.9984
CP11 vs G4CP2	-0.3055	-4,580 to 3,969	No	ns	0.9846				CP11 vs G4CP2	-0.1943	-5,982 to 5,594	No	ns	0.9966
60									60
Ctrl vs G4CP2	0.4174	-3,857 to 4,692	No	ns	0.9715				Ctrl vs G4CP2	0.4572	-5,331 to 6,245	No	ns	0.9812
Ctrl vs CP11	0.08114	-4,193 to 4,356	No	ns	0.9989				Ctrl vs CP11	0.2032	-5,585 to 5,991	No	ns	0.9963
CP11 vs G4CP2	-0.3363	-4,611 to 3,938	No	ns	0.9814				CP11 vs G4CP2	-0.2541	-6,042 to 5,534	No	ns	0.9942
90									90
Ctrl vs G4CP2	0.48	-3,795 to 4,755	No	ns	0.9624				Ctrl vs G4CP2	0.5223	-5,266 to 6,310	No	ns	0.9756
Ctrl vs CP11	-0.0825	-4,357 to 4,192	No	ns	0.9989				Ctrl vs CP11	0.1639	-5,624 to 5,952	No	ns	0.9976
CP11 vs G4CP2	-0.5625	-4,837 to 3,712	No	ns	0.9488				CP11 vs G4CP2	-0.3584	-6,146 to 5,429	No	ns	0.9884
120									120
Ctrl vs G4CP2	0.4014	-3,873 to 4,676	No	ns	0.9736				Ctrl vs G4CP2	0.7241	-5,064 to 6,512	No	ns	0.9536
Ctrl vs CP11	-0.1196	-4,394 to 4,155	No	ns	0.9976				Ctrl vs CP11	0.1681	-5,620 to 5,956	No	ns	0.9974
CP11 vs G4CP2	-0.521	-4,796 to 3,754	No	ns	0.9559				CP11 vs G4CP2	-0.556	-6,344 to 5,232	No	ns	0.9724
150									150
Ctrl vs G4CP2	0.419	-3,856 to 4,694	No	ns	0.9713				Ctrl vs G4CP2	1.086	-4,702 to 6,874	No	ns	0.8986
Ctrl vs CP11	-0.1531	-4,428 to 4,122	No	ns	0.9961				Ctrl vs CP11	0.1928	-5,595 to 5,981	No	ns	0.9966
CP11 vs G4CP2	-0.5721	-4,847 to 3,703	No	ns	0.9471				CP11 vs G4CP2	-0.8934	-6,681 to 4,894	No	ns	0.9302
180									180
Ctrl vs G4CP2	0.3476	-3,927 to 4,622	No	ns	0.9801				Ctrl vs G4CP2	1.422	-4,366 to 7,210	No	ns	0.8326
Ctrl vs CP11	-0.2337	-4,508 to 4,041	No	ns	0.991				Ctrl vs CP11	0.1918	-5,596 to 5,980	No	ns	0.9967
CP11 vs G4CP2	-0.5813	-4,856 to 3,693	No	ns	0.9454				CP11 vs G4CP2	-1.23	-7,018 to 4,558	No	ns	0.8719
210									210
Ctrl vs G4CP2	0.2141	-4,061 to 4,489	No	ns	0.9924				Ctrl vs G4CP2	2.172	-3,616 to 7,960	No	ns	0.6526
Ctrl vs CP11	-0.457	-4,732 to 3,818	No	ns	0.9659				Ctrl vs CP11	0.3661	-5,422 to 6,154	No	ns	0.9879
CP11 vs G4CP2	-0.671	-4,946 to 3,604	No	ns	0.9279				CP11 vs G4CP2	-1.806	-7,594 to 3,982	No	ns	0.7444
240									240
Ctrl vs G4CP2	0.1258	-4,149 to 4,400	No	ns	0.9974				Ctrl vs G4CP2	2.732	-3,056 to 8,520	No	ns	0.5094
Ctrl vs CP11	-0.7731	-5,048 to 3,502	No	ns	0.9055				Ctrl vs CP11	0.7586	-5,029 to 6,546	No	ns	0.9492
CP11 vs G4CP2	-0.8988	-5,173 to 3,376	No	ns	0.8744				CP11 vs G4CP2	-1.974	-7,761 to 3,814	No	ns	0.7029
270									270
Ctrl vs G4CP2	-0.1964	-4,471 to 4,078	No	ns	0.9936				Ctrl vs G4CP2	4.164	-1,624 to 9,951	No	ns	0.2101
Ctrl vs CP11	-1.343	-5,618 to 2,931	No	ns	0.7413				Ctrl vs CP11	1.004	-4,784 to 6,792	No	ns	0.9127
CP11 vs G4CP2	-1.147	-5,421 to 3,128	No	ns	0.8039				CP11 vs G4CP2	-3.16	-8,948 to 2,628	No	ns	0.406
300									300
Ctrl vs G4CP2	-0.4806	-4,755 to 3,794	No	ns	0.9623				Ctrl vs G4CP2	5.691	-0,09656 to 11,48	No	ns	0.0551
Ctrl vs CP11	-2.179	-6,454 to 2,095	No	ns	0.4555				Ctrl vs CP11	1.866	-3,922 to 7,654	No	ns	0.7297
CP11 vs G4CP2	-1.699	-5,973 to 2,576	No	ns	0.6197				CP11 vs G4CP2	-3.826	-9,613 to 1,962	No	ns	0.2675
330									330
Ctrl vs G4CP2	-0.4506	-4,725 to 3,824	No	ns	0.9668				Ctrl vs G4CP2	8.296	2,508 to 14,08	Yes	**	0.0023
Ctrl vs CP11	-2.992	-7,267 to 1,282	No	ns	0.2281				Ctrl vs CP11	2.698	-3,089 to 8,486	No	ns	0.5179
CP11 vs G4CP2	-2.542	-6,816 to 1,733	No	ns	0.3436				CP11 vs G4CP2	-5.597	-11,39 to 0,1906	No	ns	0.0606
360									360
Ctrl vs G4CP2	-0.2064	-4,481 to 4,068	No	ns	0.9929				Ctrl vs G4CP2	9.05	3,263 to 14,84	Yes	***	0.0007
Ctrl vs CP11	-4.113	-8,387 to 0,1620	No	ns	0.0623				Ctrl vs CP11	3.562	-2,226 to 9,350	No	ns	0.3185
CP11 vs G4CP2	-3.906	-8,181 to 0,3684	No	ns	0.0815				CP11 vs G4CP2	-5.488	-11,28 to 0,2994	No	ns	0.0674
390									390
Ctrl vs G4CP2	1.386	-2,888 to 5,661	No	ns	0.7269				Ctrl vs G4CP2	12.13	6,346 to 17,92	Yes	****	<0,0001
Ctrl vs CP11	-4.523	-8,797 to -0,2480	Yes	*	0.0351				Ctrl vs CP11	3.968	-1,820 to 9,756	No	ns	0.2421
CP11 vs G4CP2	-5.909	-10,18 to -1,634	Yes	**	0.0035				CP11 vs G4CP2	-8.166	-13,95 to -2,378	Yes	**	0.0028
420									420
Ctrl vs G4CP2	3.505	-0,7700 to 7,779	No	ns	0.1323				Ctrl vs G4CP2	15.41	9,620 to 21,20	Yes	****	<0,0001
Ctrl vs CP11	-5.037	-9,312 to -0,7624	Yes	*	0.0159				Ctrl vs CP11	4.183	-1,605 to 9,971	No	ns	0.2071
CP11 vs G4CP2	-8.542	-12,82 to -4,267	Yes	****	<0,0001				CP11 vs G4CP2	-11.23	-17,01 to -5,437	Yes	****	<0,0001
450									450
Ctrl vs G4CP2	5.378	1,103 to 9,652	Yes	**	0.009				Ctrl vs G4CP2	16.76	10,97 to 22,55	Yes	****	<0,0001
Ctrl vs CP11	-5.396	-9,670 to -1,121	Yes	**	0.0088				Ctrl vs CP11	5.121	-0,6671 to 10,91	No	ns	0.0952
CP11 vs G4CP2	-10.77	-15,05 to -6,499	Yes	****	<0,0001				CP11 vs G4CP2	-11.64	-17,43 to -5,852	Yes	****	<0,0001
480									480
Ctrl vs G4CP2	7.792	3,517 to 12,07	Yes	****	<0,0001				Ctrl vs G4CP2	20.66	14,87 to 26,45	Yes	****	<0,0001
Ctrl vs CP11	-5.83	-10,10 to -1,555	Yes	**	0.004				Ctrl vs CP11	6.041	0,2528 to 11,83	Yes	*	0.0384
CP11 vs G4CP2	-13.62	-17,90 to -9,347	Yes	****	<0,0001				CP11 vs G4CP2	-14.62	-20,41 to -8,832	Yes	****	<0,0001
510									510
Ctrl vs G4CP2	10.14	5,863 to 14,41	Yes	****	<0,0001				Ctrl vs G4CP2	22.38	16,59 to 28,17	Yes	****	<0,0001
Ctrl vs CP11	-5.853	-10,13 to -1,579	Yes	**	0.0039				Ctrl vs CP11	5.94	0,1519 to 11,73	Yes	*	0.0427
CP11 vs G4CP2	-15.99	-20,27 to -11,72	Yes	****	<0,0001				CP11 vs G4CP2	-16.44	-22,23 to -10,65	Yes	****	<0,0001
540									540
Ctrl vs G4CP2	12.51	8,235 to 16,78	Yes	****	<0,0001				Ctrl vs G4CP2	22.42	16,63 to 28,21	Yes	****	<0,0001
Ctrl vs CP11	-5.57	-9,845 to -1,295	Yes	**	0.0065				Ctrl vs CP11	6.402	0,6146 to 12,19	Yes	*	0.0259
CP11 vs G4CP2	-18.08	-22,35 to -13,81	Yes	****	<0,0001				CP11 vs G4CP2	-16.02	-21,81 to -10,23	Yes	****	<0,0001
570									570
Ctrl vs G4CP2	14.35	10,07 to 18,62	Yes	****	<0,0001				Ctrl vs G4CP2	27.67	21,88 to 33,46	Yes	****	<0,0001
Ctrl vs CP11	-5.844	-10,12 to -1,569	Yes	**	0.0039				Ctrl vs CP11	7.359	1,571 to 13,15	Yes	**	0.0082
CP11 vs G4CP2	-20.19	-24,47 to -15,92	Yes	****	<0,0001				CP11 vs G4CP2	-20.31	-26,10 to -14,52	Yes	****	<0,0001
600									600
Ctrl vs G4CP2	16.68	12,40 to 20,95	Yes	****	<0,0001				Ctrl vs G4CP2	32.63	26,84 to 38,41	Yes	****	<0,0001
Ctrl vs CP11	-4.999	-9,274 to -0,7246	Yes	*	0.0169				Ctrl vs CP11	8.155	2,367 to 13,94	Yes	**	0.0028
CP11 vs G4CP2	-21.68	-25,95 to -17,40	Yes	****	<0,0001				CP11 vs G4CP2	-24.47	-30,26 to -18,68	Yes	****	<0,0001
630									630
Ctrl vs G4CP2	18.53	14,26 to 22,81	Yes	****	<0,0001				Ctrl vs G4CP2	33.51	27,72 to 39,30	Yes	****	<0,0001
Ctrl vs CP11	-4.692	-8,967 to -0,4176	Yes	*	0.0273				Ctrl vs CP11	7.894	2,106 to 13,68	Yes	**	0.004
CP11 vs G4CP2	-23.22	-27,50 to -18,95	Yes	****	<0,0001				CP11 vs G4CP2	-25.62	-31,41 to -19,83	Yes	****	<0,0001
660									660
Ctrl vs G4CP2	19.41	15,13 to 23,68	Yes	****	<0,0001				Ctrl vs G4CP2	37.2	31,41 to 42,99	Yes	****	<0,0001
Ctrl vs CP11	-4.186	-8,461 to 0,08838	No	ns	0.0564				Ctrl vs CP11	7.746	1,958 to 13,53	Yes	**	0.0049
CP11 vs G4CP2	-23.59	-27,87 to -19,32	Yes	****	<0,0001				CP11 vs G4CP2	-29.46	-35,24 to -23,67	Yes	****	<0,0001
690									690
Ctrl vs G4CP2	20.96	16,68 to 25,23	Yes	****	<0,0001				Ctrl vs G4CP2	38.42	32,63 to 44,21	Yes	****	<0,0001
Ctrl vs CP11	-3.302	-7,577 to 0,9724	No	ns	0.1657				Ctrl vs CP11	8.12	2,332 to 13,91	Yes	**	0.0029
CP11 vs G4CP2	-24.26	-28,53 to -19,98	Yes	****	<0,0001				CP11 vs G4CP2	-30.3	-36,09 to -24,51	Yes	****	<0,0001
720									720
Ctrl vs G4CP2	21.56	17,29 to 25,84	Yes	****	<0,0001				Ctrl vs G4CP2	34.9	29,11 to 40,69	Yes	****	<0,0001
Ctrl vs CP11	-2.802	-7,076 to 1,473	No	ns	0.2735				Ctrl vs CP11	6.937	1,149 to 12,72	Yes	*	0.0138
CP11 vs G4CP2	-24.36	-28,64 to -20,09	Yes	****	<0,0001				CP11 vs G4CP2	-27.96	-33,75 to -22,18	Yes	****	<0,0001
750									750
Ctrl vs G4CP2	23.63	19,35 to 27,90	Yes	****	<0,0001				Ctrl vs G4CP2	33.97	28,18 to 39,76	Yes	****	<0,0001
Ctrl vs CP11	-1.973	-6,247 to 2,302	No	ns	0.5248				Ctrl vs CP11	5.672	-0,1162 to 11,46	No	ns	0.0562
CP11 vs G4CP2	-25.6	-29,88 to -21,33	Yes	****	<0,0001				CP11 vs G4CP2	-28.3	-34,09 to -22,51	Yes	****	<0,0001
780									780
Ctrl vs G4CP2	23.65	19,37 to 27,92	Yes	****	<0,0001				Ctrl vs G4CP2	36.08	30,29 to 41,87	Yes	****	<0,0001
Ctrl vs CP11	-1.504	-5,779 to 2,770	No	ns	0.687				Ctrl vs CP11	5.049	-0,7392 to 10,84	No	ns	0.1016
CP11 vs G4CP2	-25.15	-29,43 to -20,88	Yes	****	<0,0001				CP11 vs G4CP2	-31.03	-36,82 to -25,24	Yes	****	<0,0001
810									810
Ctrl vs G4CP2	24.08	19,81 to 28,35	Yes	****	<0,0001				Ctrl vs G4CP2	34.61	28,83 to 40,40	Yes	****	<0,0001
Ctrl vs CP11	-0.7686	-5,043 to 3,506	No	ns	0.9065				Ctrl vs CP11	5.107	-0,6813 to 10,89	No	ns	0.0965
CP11 vs G4CP2	-24.85	-29,12 to -20,57	Yes	****	<0,0001				CP11 vs G4CP2	-29.51	-35,30 to -23,72	Yes	****	<0,0001
840									840
Ctrl vs G4CP2	25.26	20,98 to 29,53	Yes	****	<0,0001				Ctrl vs G4CP2	38.62	32,83 to 44,41	Yes	****	<0,0001
Ctrl vs CP11	-0.2944	-4,569 to 3,980	No	ns	0.9857				Ctrl vs CP11	6.238	0,4498 to 12,03	Yes	*	0.031
CP11 vs G4CP2	-25.55	-29,83 to -21,28	Yes	****	<0,0001				CP11 vs G4CP2	-32.38	-38,17 to -26,60	Yes	****	<0,0001
870									870
Ctrl vs G4CP2	25.81	21,54 to 30,09	Yes	****	<0,0001				Ctrl vs G4CP2	41.02	35,23 to 46,81	Yes	****	<0,0001
Ctrl vs CP11	-0.3304	-4,605 to 3,944	No	ns	0.982				Ctrl vs CP11	7.422	1,634 to 13,21	Yes	**	0.0075
CP11 vs G4CP2	-26.14	-30,42 to -21,87	Yes	****	<0,0001				CP11 vs G4CP2	-33.6	-39,39 to -27,81	Yes	****	<0,0001
900									900
Ctrl vs G4CP2	25.45	21,18 to 29,73	Yes	****	<0,0001				Ctrl vs G4CP2	40.63	34,84 to 46,42	Yes	****	<0,0001
Ctrl vs CP11	-0.07359	-4,348 to 4,201	No	ns	0.9991				Ctrl vs CP11	7.478	1,690 to 13,27	Yes	**	0.007
CP11 vs G4CP2	-25.53	-29,80 to -21,25	Yes	****	<0,0001				CP11 vs G4CP2	-33.15	-38,94 to -27,36	Yes	****	<0,0001
930									930
Ctrl vs G4CP2	25.97	21,70 to 30,24	Yes	****	<0,0001				Ctrl vs G4CP2	43.74	37,95 to 49,52	Yes	****	<0,0001
Ctrl vs CP11	0.2946	-3,980 to 4,569	No	ns	0.9857				Ctrl vs CP11	7.712	1,924 to 13,50	Yes	**	0.0051
CP11 vs G4CP2	-25.68	-29,95 to -21,40	Yes	****	<0,0001				CP11 vs G4CP2	-36.02	-41,81 to -30,24	Yes	****	<0,0001
